# Supplementary material
Source: PubMed Central journal article supplement (PMC3666164)
Supplement: NIHMS459980-supplement-A_Peptidominetic.pdf [file NIHMS459980-supplement-A_Peptidominetic.pdf]

## Supplementary Materials for

### **A Peptidomimetic Targeting White Fat Causes Weight Loss and Improved Insulin Resistance in Obese Monkeys**

Kirstin F. Barnhart, Dawn R. Christianson, Patrick W. Hanley, Wouter H. P. Driessen, Bruce J. Bernacky, Wallace B. Baze, Sijin Wen, Mei Tian, Jingfei Ma, Mikhail G. Kolonin, Pradip K. Saha, Kim-Anh Do, James F. Hulvat, Juri G. Gelovani, Lawrence Chan, Wadih Arap,\* Renata Pasqualini\*

\*To whom correspondence should be addressed. E-mail: rpasqual@mdanderson.org (R.P.); warap@mdanderson.org (W.A.)

Published 9 November 2011, *Sci. Transl. Med.* **3**, 108ra112 (2011)  
DOI: 10.1126/scitranslmed.3002621

#### **The PDF file includes:**

##### Materials and Methods

Fig. S1. Intravenous glucose tolerance test for the dose-finding study.

Fig. S2. Intravenous glucose tolerance test for the fixed-dose study.

Fig. S3. Biscuit consumption during dose-finding study of adipotide.

Fig. S4. Total serum-free fatty acid change during treatment with adipotide.

Fig. S5. Body weights of lean rhesus monkeys receiving daily subcutaneous injections of adipotide.

Fig. S6. BUN and creatinine levels in lean rhesus monkeys receiving daily subcutaneous injections of adipotide.

Fig. S7. Dose-finding study in adipotide-treated obese baboons.

Fig. S8. Relative therapeutic dose of adipotide in mammalian species.

Table S1. Glucoregulatory measurements for the dose-finding study.

Table S2. Glucoregulatory measurements for the fixed-dose study.

Table S3. Summary of lipid profile for the fixed-dose efficacy study.

Table S4. Serum-free fatty acids measured.

Table S5. Summary of physical exam findings for the dose-finding study.

Table S6. Summary of serum chemistry profile for the fixed-dose efficacy study.

Table S7. Summary of urine analysis for the fixed-dose efficacy study.

References

## **Supplementary Materials and Methods**

### **Body weight and anthropomorphic measurements**

Crown-rump length, abdominal circumference, and chest circumference were measured with the monkey in right lateral recumbency. Crown-rump length was calculated as the distance from the crown to the junction of the spine and tail. Abdominal and chest circumference were determined at the level of the umbilicus and the mammary glands, respectively. Upper and lower abdominal skin fold thickness was measured in dorsal recumbency with callipers above and below the umbilicus. Additional anthropomorphic measurements that included thigh circumference, upper arm circumference, triceps skin fold and scapular skin fold thickness were carried out as described (*S1*). The BMI of rhesus monkeys was calculated by division of the body weight, measured in kg by the crown-rump length, measured in m<sup>2</sup> (*S2*).

### **Clinical pathology**

Blood samples for hematology, serum chemistry, and coagulation analysis, as well as urine samples for urinalysis, were collected from each monkey immediately prior to the onset of dosing and weekly throughout the dosing and recovery intervals for all studies. Blood samples were obtained from the femoral vein after a 12-hour fast. During the collection procedure, the monkeys were anesthetized with ketamine hydrochloride or tiletamine plus zolazepam (Telazol<sup>®</sup>). Complete blood counts were performed on an Advia 120 Hematology Analyzer. All serum chemistry analytes were analyzed on an Olympus AU400<sup>e</sup> instrument with the exception of lipid analytes (cholesterol, triglyceride, high density lipoprotein, and low density lipoprotein), which were measured on a Dade Behring Vista instrument. A coagulation panel that included fibrinogen, antithrombin III, prothrombin time, and activated partial thromboplastin time was performed on a Beckman Coulter ACL 7000 instrument.

### **Measurement of serum free fatty acids**

Total lipid free fatty acids in serum were analyzed by using a gas chromatographer equipped with a flame ionization detector (Kronos Science Laboratory, Phoenix, AZ). Serum free fatty acids (n=28; table S3) were quantitatively analyzed and reported as both a concentration and a percentage of total free fatty acids.

### **Intravenous glucose tolerance test**

To assess the initial metabolic status of each monkey, we obtained fasting blood glucose and insulin levels, and an IVGTT within one week of initial dose administration and within 72 hours of the final dose. Insulin was measured with a chemiluminescent assay. Following a 12-16 hour fast, an IVGTT was performed by intravenous administration of glucose as a 25 g/dl solution (at a concentration of 0.5 g/kg) over 3 min. Insulin and glucose were determined at baseline and 5, 10, 20, 30, 40, 50, and 60 min after the midpoint of the glucose infusion. Glucose was analyzed on an Olympus AU400<sup>e</sup> instrument, and insulin was measured on a Beckman Coulter DXI instrument. The AUC for insulin was determined with the trapezoidal rule (S3).

### **Statistical methods**

Mann-Whitney-Wilcoxon test was used to assess the difference of a numerical variable between treatment groups and a paired t-test was used to assess the difference of a numerical variable between treatment groups at different time points. For numerical variables, a mixed-effects model was fitted with a group-by-time interaction to assess the changes over time between treatment groups (S4).

# Supplementary Figures

## Fig. S1

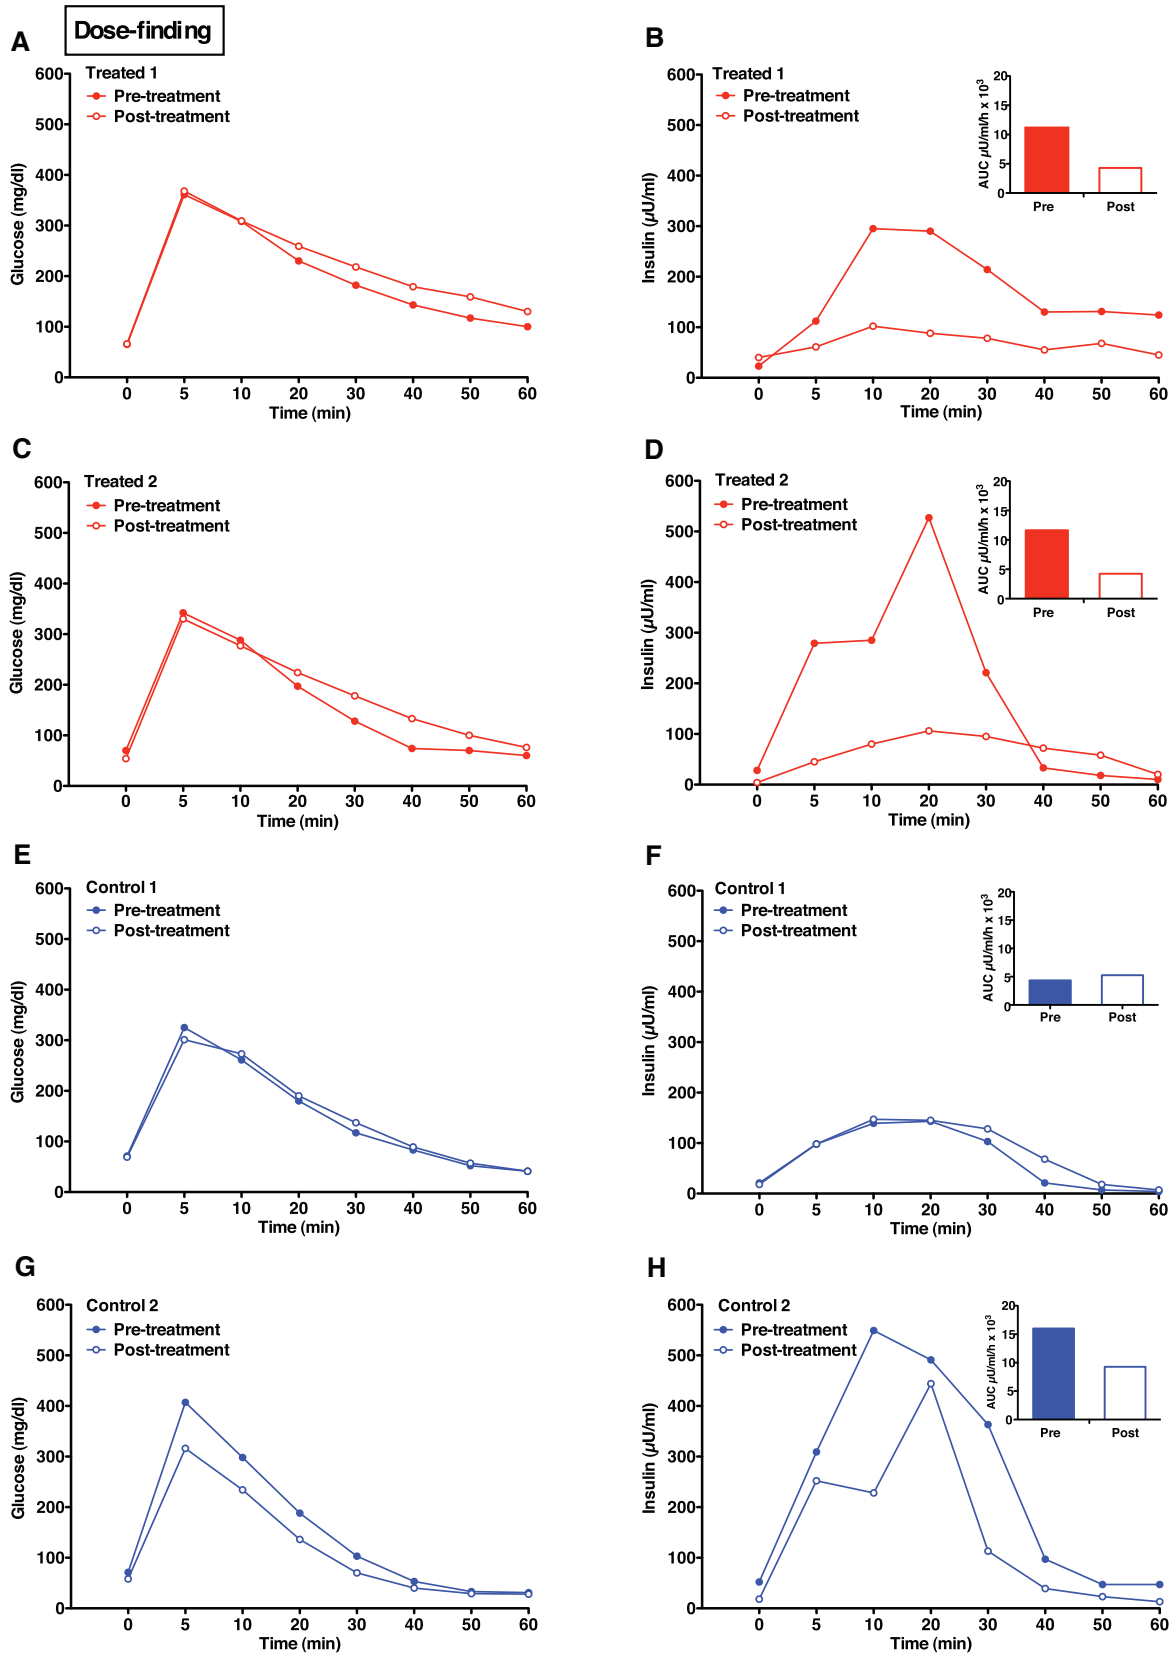

**Fig. S1.** Intravenous glucose tolerance test for the dose-finding study. An intravenous glucose tolerance test (IVGTT) was performed within seven days of the initial dose and three days following the final dose of adipotide. **(A)** In a single morbidly obese monkey, blood glucose levels failed to return to baseline 60 min after glucose administration. **(B)** After nine weeks of daily treatment with adipotide, blood glucose remained elevated at 60 min, but the area under the curve (AUC) for insulin markedly dropped (>60% decrease from baseline). **(C and D)** The AUC for insulin in a second adipotide-treated obese monkey also markedly decreased (> 60%) while glucose levels remained normal before and after treatment. **(E to H)** Obese monkeys that received saline as a negative control exhibited no detectable alterations between the pre- and post-treatment measurements.

Fig. S2

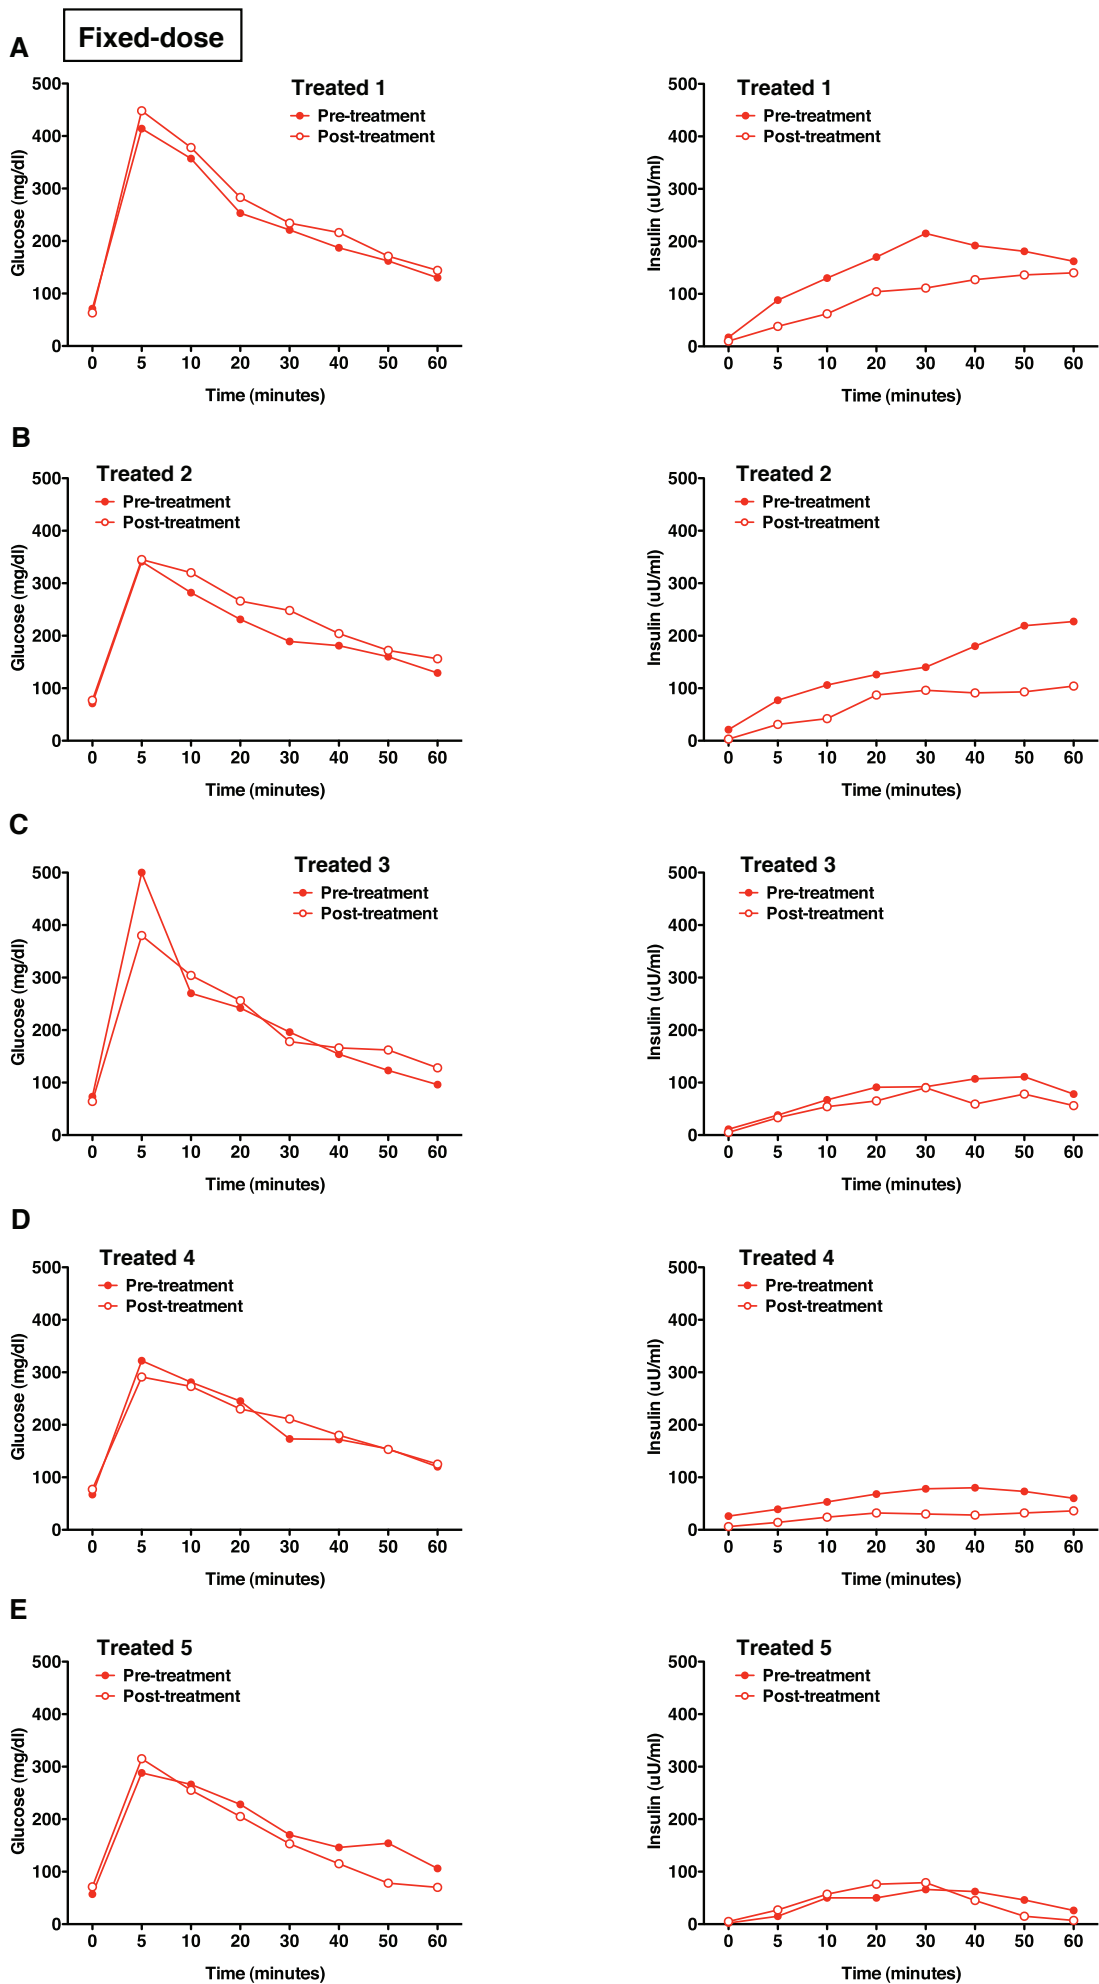

Fig. S2cont.

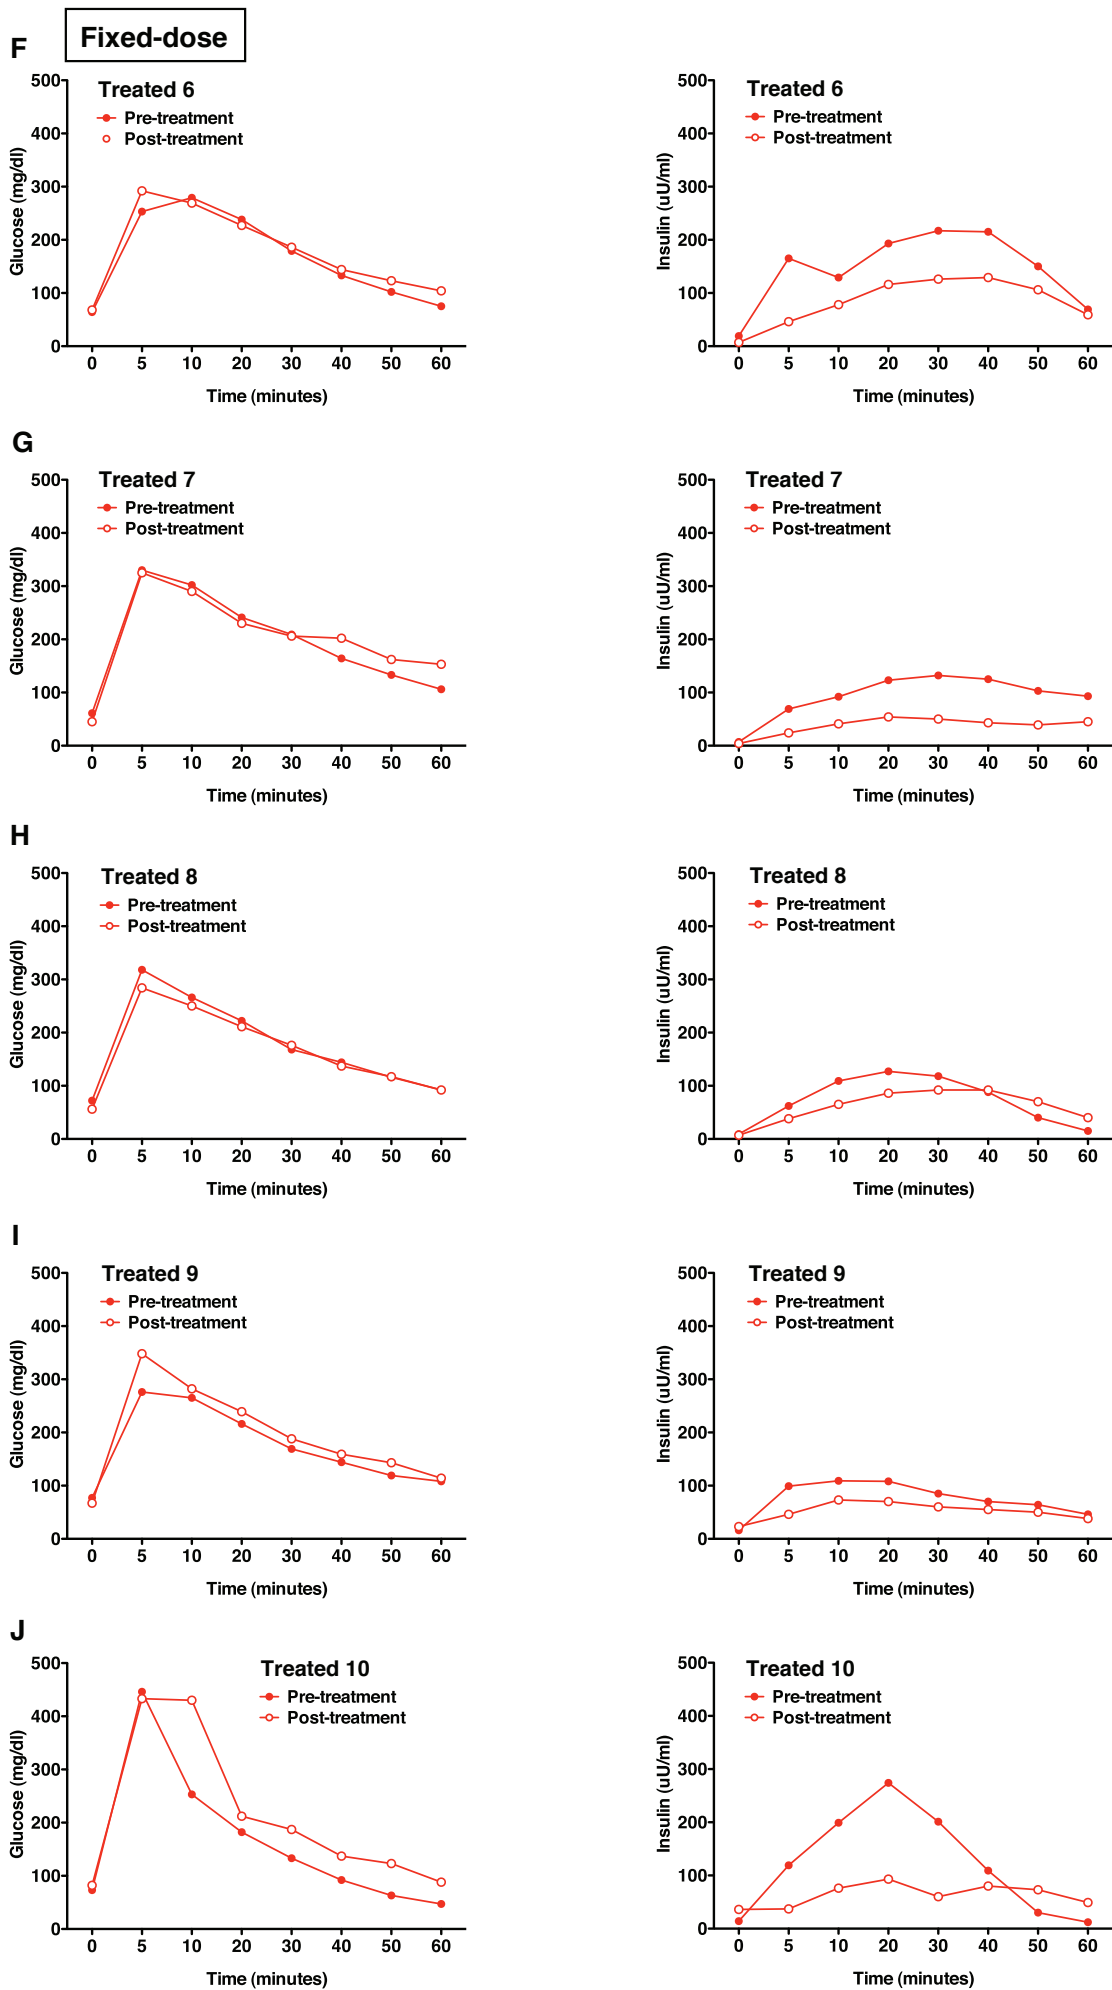

Fig. S2cont.

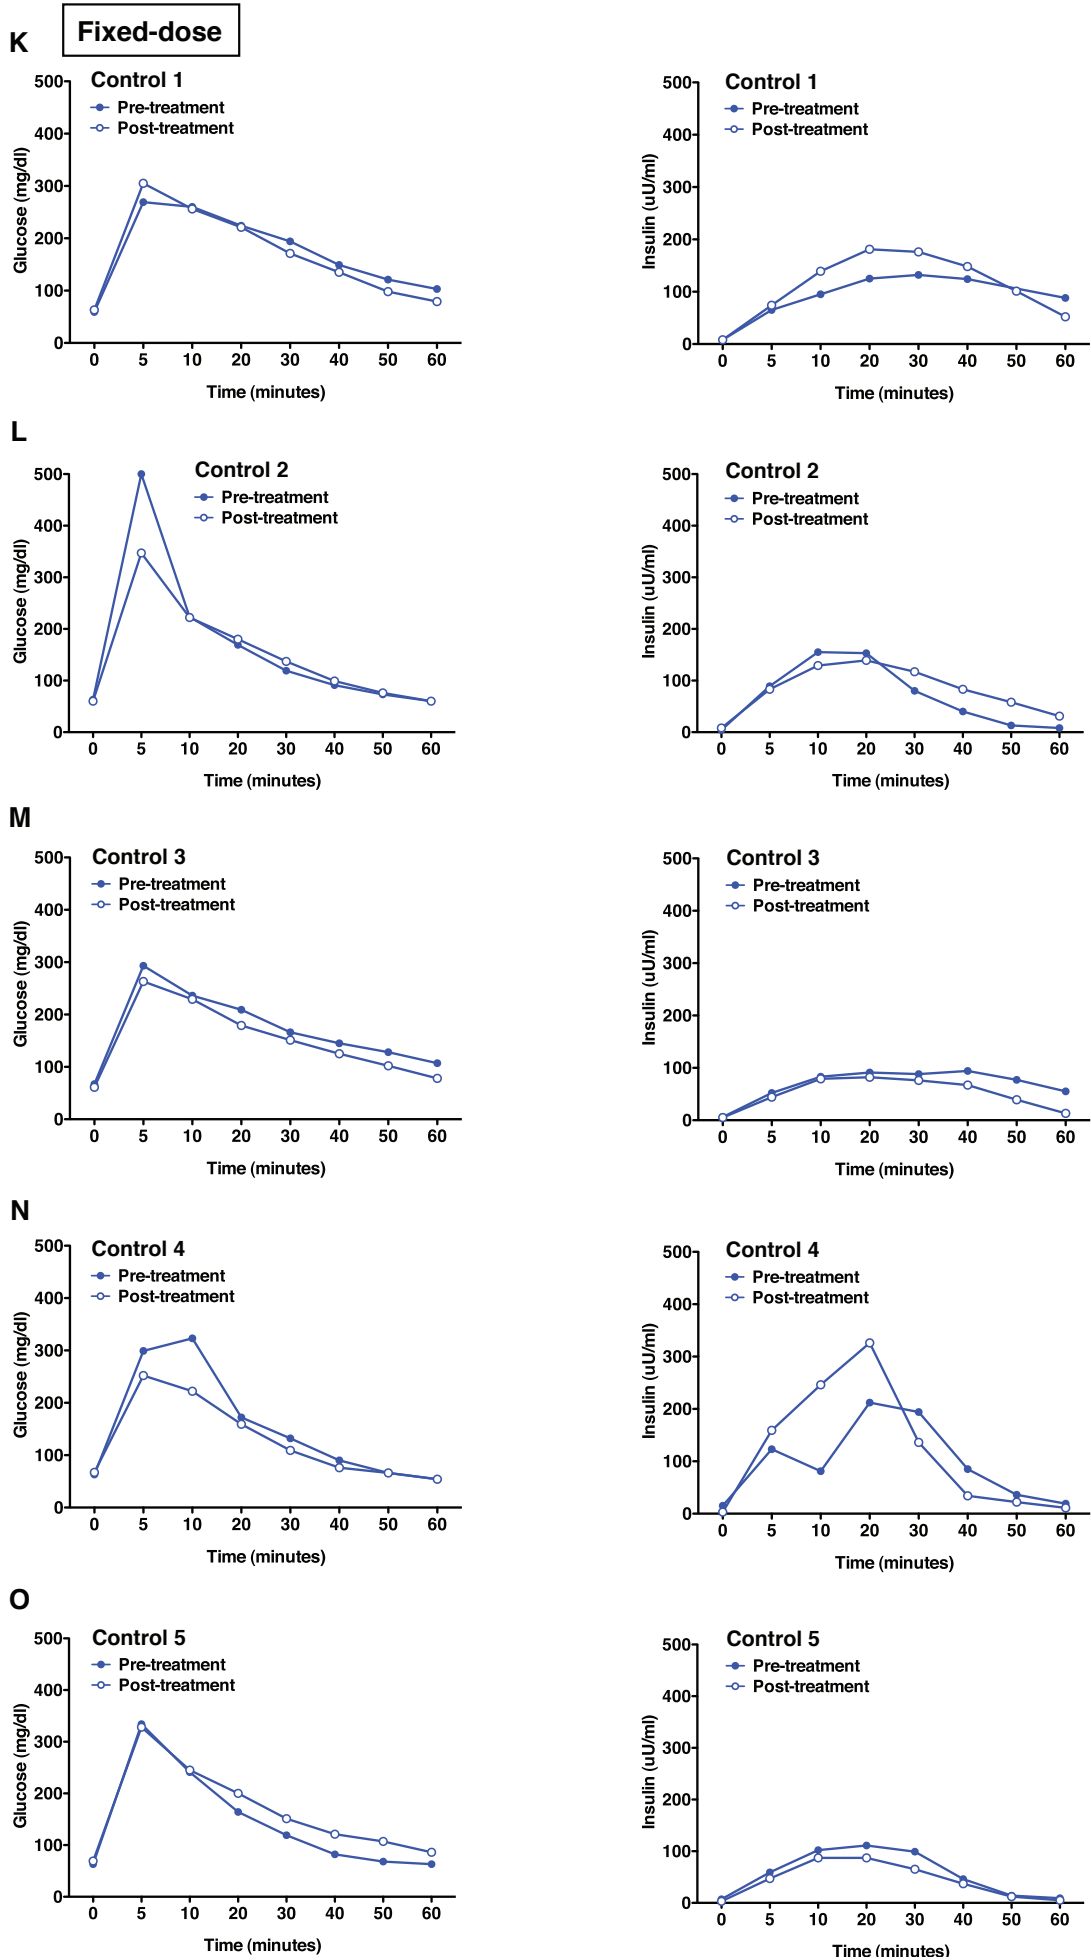



**Fig. S2.** Intravenous glucose tolerance test for the fixed-dose study. An intravenous glucose tolerance test (IVGTT) was performed within seven days of the initial dose and within three days following the final dose of adipotide. (A to O) Glucose levels for the treated (A to J) and control (K to O) monkeys were normal and relatively unchanged from pre- to post-treatment. The insulin response was reduced in treated monkeys (A to J) and unchanged in control monkeys (K to O).

**Fig. S3**

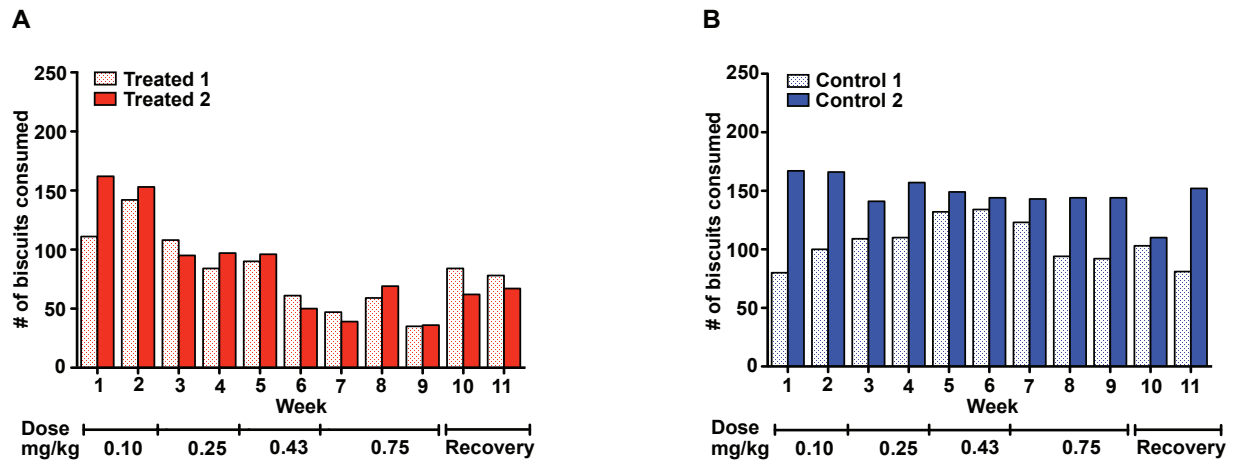

**Fig. S3.** Biscuit consumption during dose-finding study of adipotide. **(A)** An inverse relationship between biscuit consumption and the dose of adipotide was observed. Consumption appeared to increase following cessation of drug administration in the treated groups; **(B)** consumption remained relatively constant throughout the studies in control groups.

**Fig. S4**

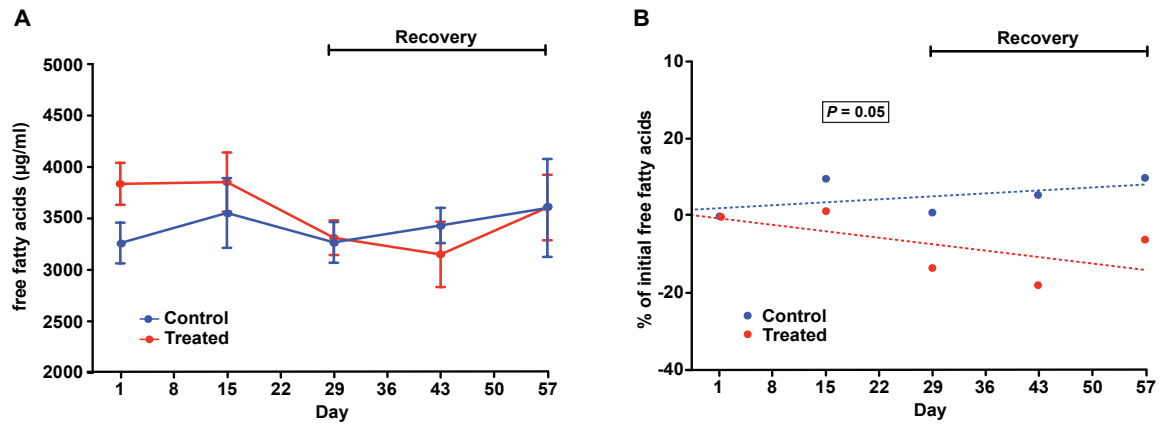

**Fig. S4.** Total serum-free fatty acid change during treatment with adipotide. **(A)** The microgram per milliliter plasma of twenty-four different fatty acids decreased during adipotide treatment. **(B)** There is a marginal significant difference between the slopes of the treated and control groups for percent change in fatty acids over time (control, n=3; treated, n=6).

Fig. S5

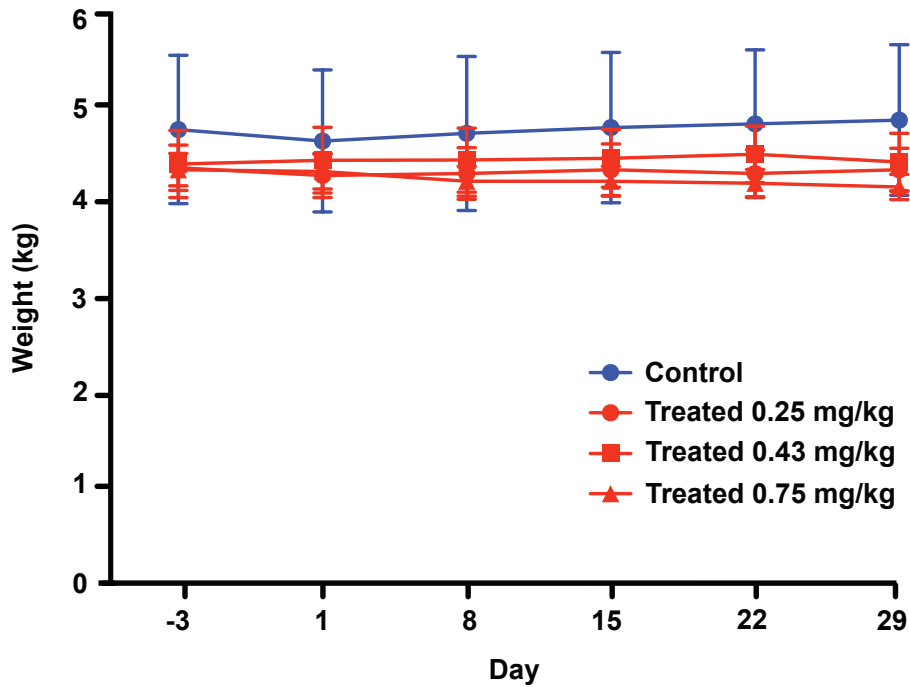

**Fig. S5.** Body weights of lean rhesus monkeys receiving daily subcutaneous injections of adipotide. Monkeys received three dose levels of adipotide (from 0.25 to 0.75 mg/kg) daily for 28 days (n=5 per group). Monkeys receiving 0.25 mg/kg and 0.43 mg/kg of adipotide did not lose weight while monkeys receiving 0.75 mg/kg of adipotide either maintained their pre-study weight or displayed mild weight loss. This trend was not statistically significant.

**Fig. S6**

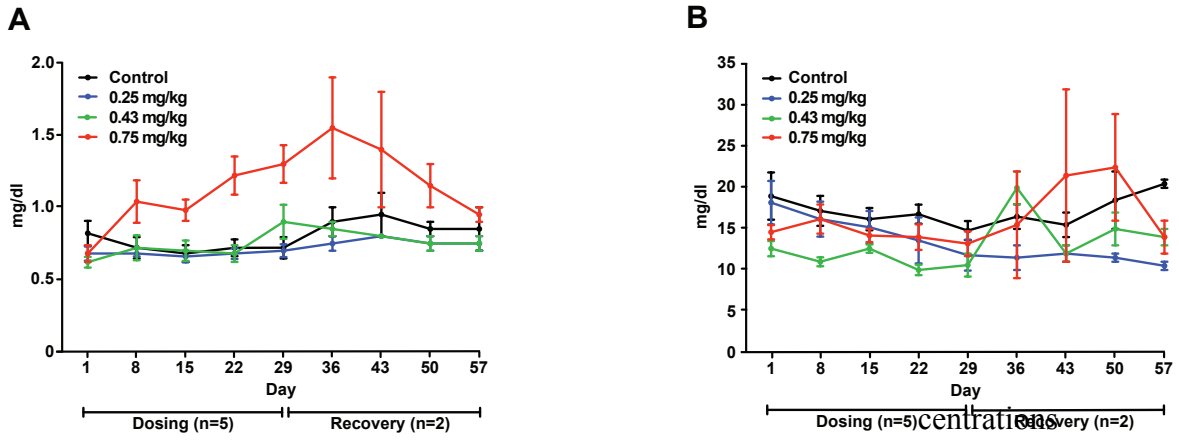

**Fig. S6.** BUN and creatinine levels in lean rhesus monkeys receiving daily subcutaneous injections of adipotide. Monkeys received three dose levels of adipotide (from 0.25 to 0.75 mg/kg) daily for 28 days (n=5 per group). (A) Creatinine was elevated primarily in the high dose group (0.75 mg/kg) throughout the dosing period. This change was nearly resolved at the end of the recovery period. (B) Concurrent elevations in BUN from baseline were not observed at any dose level.

**Fig. S7**

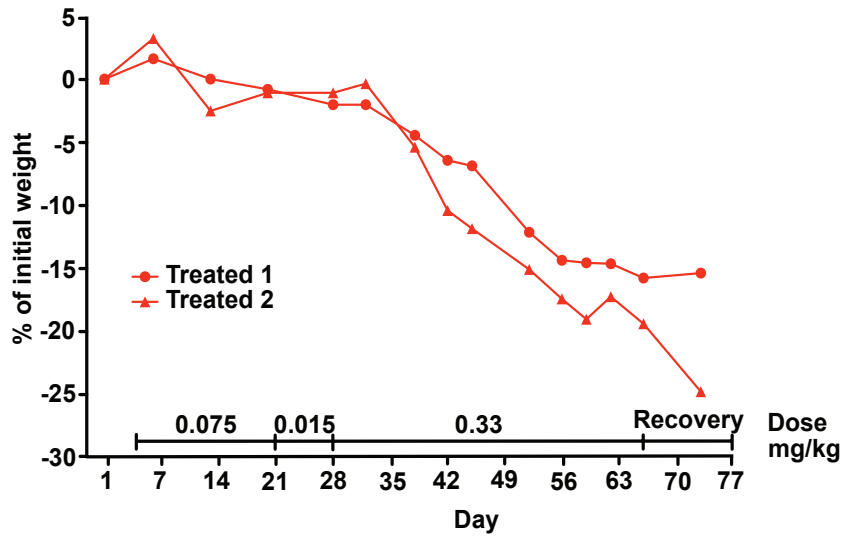

**Fig. S7.** Dose-finding study in adipotide-treated obese baboons. We determined the optimal dose of adipotide to be 0.33 mg/kg.

Fig. S8

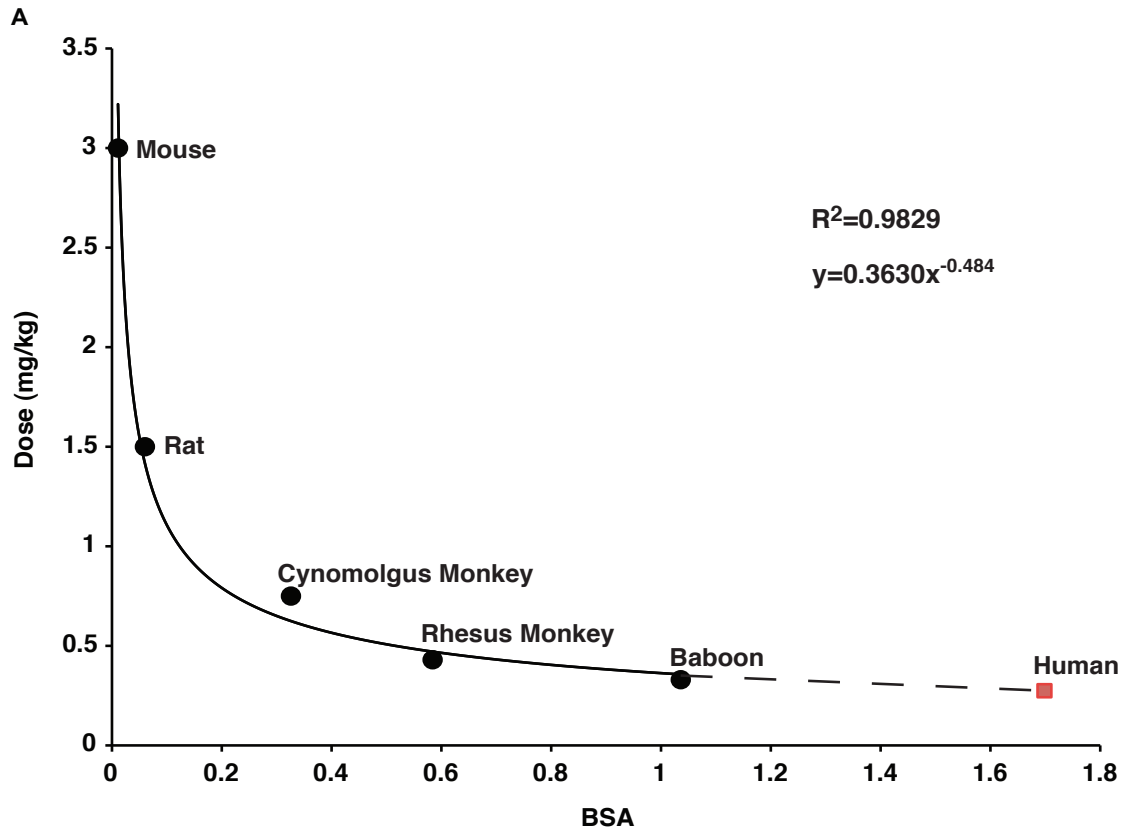

B

| Species           | Body Weight (kg) | BSA (m <sup>2</sup> ) | Dose (mg/kg) |
|-------------------|------------------|-----------------------|--------------|
| Mouse             | 0.04             | 0.011                 | 3            |
| Rat               | 0.55             | 0.06                  | 1.5          |
| Cynomolgus Monkey | 4.6              | 0.326                 | 0.75         |
| Rhesus Monkey     | 11               | 0.584                 | 0.43         |
| Baboon            | 26               | 1.036                 | 0.33         |
| Human             | 65               | 1.7                   | 0.28         |

**Fig. S8.** Relative therapeutic dose of adipotide in mammalian species. (A) A non-linear regression was used to fit an empiric correlation between the optimal therapeutic dose of adipotide (experimentally determined) and the body surface area (BSA). (B) Based on these five rodent and non-human primate species, we extrapolated a predicted dose of adipotide for human application (indicated in red).

**Table S1. Glucoregulatory measurements for the dose-finding study**

|                                | Treated 1 |       | Treated 2 |       | Control 1 |       | Control 2 |       |
|--------------------------------|-----------|-------|-----------|-------|-----------|-------|-----------|-------|
|                                | Pre       | Post  | Pre       | Post  | Pre       | Post  | Pre       | Post  |
| Fasting glucose (mg/dl)        | 65        | 65    | 70        | 54    | 71        | 69    | 71        | 58    |
| 60 min glucose (mg/dl)         | 100       | 130   | 60        | 76    | 41        | 41    | 31        | 33    |
| Fasting insulin ( $\mu$ U/ml)  | 23        | 40    | 28        | 4     | 21        | 18    | 52        | 18    |
| Peak insulin ( $\mu$ U/ml)     | 295       | 102   | 527       | 106   | 143       | 147   | 549       | 444   |
| Time of insulin peak (min)     | 10        | 10    | 20        | 20    | 20        | 10    | 10        | 20    |
| AUC of insulin ( $\mu$ U/ml/h) | 11,100    | 4,285 | 11,643    | 4,245 | 4,345     | 5,263 | 16,008    | 9,270 |



**Table S2. Glucoregulatory measurements for the fixed-dose study**

|                                | Treated 1 |       | Treated 2 |       | Treated 3 |       | Treated 4 |       | Treated 5 |       | Treated 6 |       | Treated 7 |       | Treated 8 |       | Treated 9 |       | Treated 10 |       |
|--------------------------------|-----------|-------|-----------|-------|-----------|-------|-----------|-------|-----------|-------|-----------|-------|-----------|-------|-----------|-------|-----------|-------|------------|-------|
|                                | Pre       | Post  | Pre        | Post  |
| Fasting glucose (mg/dl)        | 71        | 63    | 73        | 64    | 64        | 45    | 73        | 82    | 67        | 77    | 57        | 71    | 64        | 68    | 72        | 56    | 77        | 67    | 71         | 77    |
| 60 min glucose (mg/dl)         | 130       | 144   | 96        | 128   | 106       | 153   | 47        | 88    | 120       | 125   | 106       | 70    | 75        | 104   | 92        | 92    | 108       | 114   | 129        | 156   |
| Fasting insulin ( $\mu$ U/ml)  | 17        | 10    | 11        | 5     | 7         | 4     | 14        | 36    | 26        | 6     | 2         | 5     | 19        | 7     | 9         | 7     | 16        | 23    | 21         | 3     |
| Peak insulin ( $\mu$ U/ml)     | 215       | 140   | 111       | 90    | 132       | 54    | 274       | 93    | 80        | 36    | 66        | 79    | 217       | 129   | 127       | 92    | 109       | 73    | 227        | 104   |
| Time of insulin peak (min)     | 30        | 60    | 50        | 30    | 30        | 20    | 20        | 20    | 40        | 60    | 30        | 30    | 30        | 40    | 20        | 30    | 10        | 10    | 60         | 60    |
| AUC of insulin ( $\mu$ U/ml/h) | 9,848     | 6,160 | 5,120     | 3,783 | 6,348     | 2,523 | 8,323     | 4,150 | 3,948     | 1,665 | 2,760     | 2,825 | 9,935     | 5,898 | 4,955     | 4,295 | 4,853     | 3,375 | 9,018      | 4,668 |

|                                | Control 1 |       | Control 2 |       | Control 3 |       | Control 4 |       | Control 5 |       |
|--------------------------------|-----------|-------|-----------|-------|-----------|-------|-----------|-------|-----------|-------|
|                                | Pre       | Post  |
| Fasting glucose (mg/dl)        | 63        | 60    | 63        | 69    | 63        | 67    | 67        | 61    | 59        | 63    |
| 60 min glucose (mg/dl)         | 60        | 60    | 63        | 86    | 54        | 54    | 107       | 78    | 103       | 79    |
| Fasting insulin ( $\mu$ U/ml)  | 4         | 8     | 7         | 3     | 15        | 3     | 6         | 5     | 8         | 8     |
| Peak insulin ( $\mu$ U/ml)     | 155       | 87    | 111       | 139   | 212       | 326   | 94        | 82    | 132       | 176   |
| Time of insulin peak (min)     | 10        | 10    | 20        | 20    | 20        | 20    | 40        | 20    | 30        | 30    |
| AUC of insulin ( $\mu$ U/ml/h) | 4,518     | 2,943 | 3,823     | 5,515 | 6,625     | 7,883 | 4,673     | 3,530 | 6,368     | 7,753 |

**Table S3. Summary of lipid profile for the fixed-dose efficacy study: Control animals C1-C5**

| <b>Animal ID#</b> | <b>Day</b> | <b>Chol mg/dl</b> | <b>Trig mg/dl</b> | <b>HDL mg/dl</b> | <b>LDL mg/dl</b> |
|-------------------|------------|-------------------|-------------------|------------------|------------------|
| C1                | 1          | 119               | 59                | 69               | 38               |
| C1                | 8          | 119               | 59                | 69               | 38               |
| C1                | 15         | 116               | 38                | 64               | 44               |
| C1                | 22         | 122               | 40                | 73               | 41               |
| C1                | 29         | 141               | 46                | 81               | 51               |
| C1                | 36         | 132               | 47                | 71               | 52               |
| C1                | 43         | 143               | 54                | 80               | 52               |
| C1                | 50         | 144               | 59                | 90               | 42               |
| C1                | 57         | 145               | 49                | 77               | 58               |
| C2                | 1          | 95                | 91                | 44               | 33               |
| C2                | 8          | 95                | 91                | 44               | 33               |
| C2                | 15         | 87                | 103               | 42               | 24               |
| C2                | 22         | 96                | 99                | 44               | 33               |
| C2                | 29         | 92                | 98                | 45               | 27               |
| C2                | 36         | 96                | 104               | 44               | 31               |
| C2                | 43         | 94                | 104               | 44               | 29               |
| C2                | 50         | 89                | 137               | 45               | 17               |
| C2                | 57         | 100               | 92                | 49               | 33               |
| C3                | 1          | 123               | 48                | 76               | 37               |
| C3                | 8          | 123               | 48                | 76               | 37               |
| C3                | 15         | 124               | 27                | 80               | 39               |
| C3                | 22         | 122               | 30                | 80               | 36               |
| C3                | 29         | 120               | 67                | 72               | 35               |
| C3                | 36         | 118               | 41                | 71               | 39               |
| C3                | 43         | 121               | 31                | 76               | 39               |
| C3                | 50         | 117               | 37                | 76               | 34               |
| C3                | 57         | 127               | 67                | 67               | 47               |
| C4                | 1          | 149               | 101               | 79               | 50               |
| C4                | 8          | 127               | 39                | 84               | 35               |
| C4                | 15         | 145               | 48                | 85               | 50               |
| C4                | 22         | 154               | 46                | 93               | 52               |
| C4                | 29         | 161               | 56                | 87               | 63               |
| C4                | 36         | 149               | 47                | 89               | 51               |
| C4                | 43         | 155               | 60                | 95               | 48               |
| C4                | 50         | 168               | 46                | 102              | 57               |
| C4                | 57         | 155               | 45                | 101              | 45               |
| C5                | 1          | 102               | 38                | 60               | 34               |
| C5                | 8          | 102               | 21                | 59               | 39               |
| C5                | 15         | 105               | 31                | 62               | 37               |
| C5                | 22         | 111               | 24                | 69               | 37               |
| C5                | 29         | 100               | 23                | 57               | 38               |
| C5                | 36         | 94                | 20                | 58               | 32               |
| C5                | 43         | 113               | 39                | 61               | 44               |
| C5                | 50         | 112               | 27                | 68               | 39               |
| C5                | 57         | 97                | 28                | 62               | 29               |

**Table S3 (cont.). Summary of lipid profile for the fixed-dose efficacy study: Treated animals**

**T1-T10**

| <b>Animal ID#</b> | <b>Day</b> | <b>Chol mg/dl</b> | <b>Trig mg/dl</b> | <b>HDL mg/dl</b> | <b>LDL mg/dl</b> | <b>Animal ID#</b> | <b>Day</b> | <b>Chol mg/dl</b> | <b>Trig mg/dl</b> | <b>HDL mg/dl</b> | <b>LDL mg/dl</b> |
|-------------------|------------|-------------------|-------------------|------------------|------------------|-------------------|------------|-------------------|-------------------|------------------|------------------|
| T1                | 1          | 153               | 116               | 70               | 60               | T6                | 1          | 123               | 82                | 71               | 36               |
| T1                | 8          | 153               | 116               | 70               | 60               | T6                | 8          | 123               | 82                | 71               | 36               |
| T1                | 15         | 155               | 93                | 77               | 59               | T6                | 15         | 105               | 64                | 59               | 33               |
| T1                | 22         | 158               | 41                | 86               | 64               | T6                | 22         | 95                | 53                | 60               | 24               |
| T1                | 29         | 148               | 59                | 82               | 54               | T6                | 29         | 82                | 55                | 51               | 20               |
| T1                | 36         | 133               | 63                | 71               | 49               | T6                | 36         | 76                | 62                | 47               | 17               |
| T1                | 43         | 133               | 88                | 74               | 41               | T6                | 43         | 78                | 59                | 46               | 20               |
| T1                | 50         | 127               | 79                | 71               | 40               | T6                | 50         | 68                | 101               | 38               | 10               |
| T1                | 57         | 152               | 99                | 71               | 61               | T6                | 57         | 77                | 98                | 44               | 13               |
| T2                | 1          | 144               | 48                | 73               | 61               | T7                | 1          | 100               | 143               | 47               | 24               |
| T2                | 8          | 144               | 48                | 73               | 61               | T7                | 8          | 89                | 87                | 45               | 27               |
| T2                | 15         | 144               | 32                | 76               | 62               | T7                | 15         | 106               | 159               | 39               | 35               |
| T2                | 22         | 137               | 37                | 76               | 54               | T7                | 22         | 90                | 55                | 61               | 18               |
| T2                | 29         | 133               | 29                | 70               | 57               | T7                | 29         | 92                | 44                | 58               | 25               |
| T2                | 36         | 132               | 29                | 73               | 53               | T7                | 36         | 101               | 79                | 40               | 45               |
| T2                | 43         | 120               | 29                | 68               | 46               | T7                | 43         | 89                | 106               | 38               | 30               |
| T2                | 50         | 114               | 43                | 64               | 41               | T7                | 50         | 96                | 68                | 47               | 35               |
| T2                | 57         | 134               | 42                | 68               | 58               | T7                | 57         | 89                | 140               | 40               | 21               |
| T3                | 1          | 114               | 80                | 52               | 46               | T8                | 1          | 122               | 70                | 59               | 49               |
| T3                | 8          | 114               | 80                | 52               | 46               | T8                | 8          | 138               | 49                | 67               | 61               |
| T3                | 15         | 125               | 47                | 69               | 47               | T8                | 15         | 127               | 67                | 59               | 55               |
| T3                | 22         | 112               | 50                | 62               | 40               | T8                | 22         | 124               | 54                | 59               | 54               |
| T3                | 29         | 115               | 54                | 59               | 45               | T8                | 29         | 119               | 41                | 56               | 55               |
| T3                | 36         | 102               | 49                | 57               | 35               | T8                | 36         | 114               | 40                | 57               | 49               |
| T3                | 43         | 112               | 36                | 63               | 42               | T8                | 43         | 106               | 49                | 51               | 45               |
| T3                | 50         | 106               | 48                | 65               | 31               | T8                | 50         | 100               | 41                | 53               | 39               |
| T3                | 57         | 109               | 114               | 46               | 40               | T8                | 57         | 109               | 99                | 47               | 42               |
| T4                | 1          | 221               | 56                | 114              | 96               | T9                | 1          | 141               | 62                | 73               | 56               |
| T4                | 8          | 221               | 56                | 114              | 96               | T9                | 8          | 155               | 53                | 83               | 61               |
| T4                | 15         | 210               | 39                | 118              | 84               | T9                | 15         | 150               | 66                | 76               | 61               |
| T4                | 22         | 203               | 26                | 123              | 74               | T9                | 22         | 142               | 59                | 73               | 57               |
| T4                | 29         | 202               | 29                | 116              | 80               | T9                | 29         | 155               | 44                | 83               | 63               |
| T4                | 36         | 174               | 31                | 103              | 65               | T9                | 36         | 145               | 33                | 74               | 64               |
| T4                | 43         | 169               | 33                | 100              | 62               | T9                | 43         | 127               | 38                | 73               | 46               |
| T4                | 50         | 164               | 40                | 107              | 49               | T9                | 50         | 107               | 67                | 60               | 34               |
| T4                | 57         | 170               | 43                | 90               | 71               | T9                | 57         | NA                | NA                | NA               | NA               |
| T5                | 1          | 205               | 75                | 98               | 93               | T10               | 1          | 94                | 103               | 59               | 14               |
| T5                | 8          | 206               | 75                | 98               | 93               | T10               | 8          | 112               | 54                | 79               | 22               |
| T5                | 15         | 162               | 51                | 94               | 58               | T10               | 15         | 98                | 72                | 58               | 26               |
| T5                | 22         | 169               | 78                | 81               | 72               | T10               | 22         | 101               | 97                | 46               | 36               |
| T5                | 29         | 147               | 77                | 68               | 64               | T10               | 29         | 78                | 54                | 56               | 11               |
| T5                | 36         | 114               | 67                | 59               | 42               | T10               | 36         | 67                | 53                | 46               | 10               |
| T5                | 43         | 82                | 37                | 57               | 18               | T10               | 43         | 61                | 40                | 43               | 10               |
| T5                | 50         | 129               | 47                | 69               | 51               | T10               | 50         | 67                | 46                | 45               | 13               |
| T5                | 57         | 148               | 41                | 92               | 48               | T10               | 57         | 64                | 49                | 42               | 12               |

**Table S4. Serum-free fatty acids measured**

|                        |                 |
|------------------------|-----------------|
| ALPHA-LINOLENIC        | ERUCIC          |
| ARACHIDIC              | GAMMA-LINOLENIC |
| ARACHIDONIC            | HENEICOSANOIC   |
| BEHENIC                | HEPTADECANOIC   |
| cis-10-HEPTADECANOIC   | LIGNOCERIC      |
| DIHOMO-GAMMA-LINOLENIC | LINOLEIC        |
| DOCOSADIENOIC          | LINOLELAIDIC    |
| DOCOSAHEXAENOIC        | NERVONIC        |
| DOCOSAPENTAENOIC       | OLEIC           |
| EICOSADIENOIC          | PALMITIC        |
| EICOSAPENTAENOIC       | PALMITOLEIC     |
| EICOSATRIENOIC         | PENTADECENOIC   |
| EICOSENOIC             | STEARIC         |
| ELAIDIC                | TRICOSANOIC     |

**Table S5. Summary of physical exam findings for the dose-finding study**

| <b>TREATED ANIMALS</b>                                     |                                                                                                                                                                                                                                                                                                                                                                                                                                                   |                                                                                                        |                                                                                          |
|------------------------------------------------------------|---------------------------------------------------------------------------------------------------------------------------------------------------------------------------------------------------------------------------------------------------------------------------------------------------------------------------------------------------------------------------------------------------------------------------------------------------|--------------------------------------------------------------------------------------------------------|------------------------------------------------------------------------------------------|
| <b>LARGE BOWEL</b>                                         | <b>INTEGUMENT</b>                                                                                                                                                                                                                                                                                                                                                                                                                                 | <b>HANDS, ARMS AND EARS</b>                                                                            | <b>COMMENTS</b>                                                                          |
| Very firm feces in the large colon.                        | Small fleshy lipoma in right inguinal. Lipoma at right axillary.                                                                                                                                                                                                                                                                                                                                                                                  | Missing tops of digit 2, 4, and 5 on right hand. Missing most of left pinna and right pinna            | Approximately 5% dehydrated.                                                             |
| Mildly dehydrated with firm feces in large colon           | Mild inguinal bruising - on left side predominantly                                                                                                                                                                                                                                                                                                                                                                                               | Missing digit 1 on left hand. Missing tip on digit 3 on right hand. Missing parts of pinna bilaterally | Mensing                                                                                  |
| Firm stool palpated in abdomen                             | Left upper quadrant - scarring - slightly raised areas - no erythema (two areas)                                                                                                                                                                                                                                                                                                                                                                  |                                                                                                        | A 2 cm incision was made lateral to umbilicus on left side                               |
| Pelleted stool felt in large colon on palpation            | Bruising to left lower and upper quadrants - stable from previous exam (raised scars; no erythema). Bruising - ventral midline above pubic symphysis                                                                                                                                                                                                                                                                                              |                                                                                                        | Small umbilical hernia                                                                   |
| Pelleted stool felt in large colon                         | Left upper and lower quadrants - bruising is resolving.                                                                                                                                                                                                                                                                                                                                                                                           |                                                                                                        | 5% dehydrated                                                                            |
| Pelleted stool palpated in abdomen.                        | Lower left quadrant. Area of skin discoloration and depression - approximately (1.5 cm x 1.5 cm). There is a 2cm streak of erythema on the dorsal edge of the discoloration. This could represent an area of ulceration in its infancy. Small pinpoint areas of erythema localized to upper thoracic wall extending to ventral neck.                                                                                                              |                                                                                                        | Approximately 5% dehydrated                                                              |
| Pelleted stool in abdomen but less firm than previous exam | Left lower quadrant - ulcer is still evident (1.5cm x 1cm) - no additional erythema around edges - area of ulcer is discolored to a black color. Small 1.5 cm x 0.25 cm streak of hemorrhage in upper left quadrant.                                                                                                                                                                                                                              |                                                                                                        | Mildly dehydrated (5%)                                                                   |
|                                                            | There are streaks of erythema with bruising (approx 7 cm in length) in the upper left quadrant. In addition, there is a small ulceration in upper left quadrant. In lower quadrant, there is erythema and bruising on the ventral portion of the quadrant (approx 5.5 cm in length). The ulcer is black and necrotic in middle (1.5 cm x 1 cm) with erythema around edge. There are additional scratches to posterior region of quadrant as well. |                                                                                                        | Approximately 5% dehydrated. A 2 cm incision was made lateral to umbilicus on left side. |
|                                                            | Left lower quadrant - sutures removed and the scab over the ulcer has been removed. There is a purulent material within the wound, which will be cleaned and left to heal by second intention. The other biopsy site has mild bruising. There is bruising in the inguinal area.                                                                                                                                                                   |                                                                                                        |                                                                                          |
|                                                            | Bruising around biopsy site on ventral abdomen. Ulcer - lower left quadrant - erythema around edges. Biopsy site in upper right quadrant - crusted no bruising. Inguinal bruising bilateral. Bruising of forearms bilateral (catheter sites)                                                                                                                                                                                                      |                                                                                                        |                                                                                          |

**Table S5 (cont.). Summary of physical exam findings for the dose-finding study**

| LARGE BOWEL | INTEGUMENT                                                                                                                                                                                                                                       | HANDS, ARMS AND EARS | COMMENTS |
|-------------|--------------------------------------------------------------------------------------------------------------------------------------------------------------------------------------------------------------------------------------------------|----------------------|----------|
|             | Lower left quadrant - ulcer is healing well - slight erythema on edges (1 cm x 0.5 cm). No discharge noted. SQ fat biopsy healing well - dark center with slight erythema on edges. Upper right quadrant - very small crust left at biopsy site. |                      |          |
|             | Bruising erythema along both arms                                                                                                                                                                                                                |                      |          |
|             | Erythema on wrists - stable                                                                                                                                                                                                                      |                      |          |
|             | Erythema at wrists bilateral - improving                                                                                                                                                                                                         |                      |          |
|             | Erythema stable from previous examination. Right upper quadrant - below axillary, 3 cm x 1.5 cm - area of erythema with clearing in middle. Appears like an ulcer that has crusted and healed.                                                   |                      |          |
|             | Erythema stable from previous examination. Right upper quadrant - below axillary - are of crusting - much less erythema than previous. (1.3 cm x 1.7 cm)                                                                                         |                      |          |
|             | Erythema on wrists stable. Right upper quadrant ulcer is resolved to scar.                                                                                                                                                                       |                      |          |
|             | Bruising to inguinal region. Very mild bruising around biopsy sites. Right upper quadrant healed.                                                                                                                                                |                      |          |
|             | Crusting at skin biopsy sites - no discharge seen. Very minimal bruising at subcutaneous fat biopsy location.                                                                                                                                    |                      |          |
|             | All biopsy sites (upper quadrants and SQ fat biopsy) are healing well with very small crusts and no discharge.                                                                                                                                   |                      |          |
|             | Erythema stable from previous examination. Right upper quadrant - below axillary region (1.6 cm x 1.7 cm) - crust almost completely resolved - erythema has lessened and healing appears good.                                                   |                      |          |
|             | Erythema stable on wrists. Right upper quadrant - ulceration completely crusted over - healing very well.                                                                                                                                        |                      |          |
|             | Erythema on wrists stable. Right upper quadrant ulcer - healed to a single line (0.5 cm in length)                                                                                                                                               |                      |          |

**Table S5 (cont.). Summary of physical exam findings for the dose-finding study**

| <b>CONTROL ANIMALS</b>                                                                                                                                                                                                 |                                                                                                                                                                        |                                                                                                                       |                                             |
|------------------------------------------------------------------------------------------------------------------------------------------------------------------------------------------------------------------------|------------------------------------------------------------------------------------------------------------------------------------------------------------------------|-----------------------------------------------------------------------------------------------------------------------|---------------------------------------------|
| <b>HAIR COAT</b>                                                                                                                                                                                                       | <b>INTEGUMENT</b>                                                                                                                                                      | <b>FEET, LEGS, EARS, ORAL MUCOSA</b>                                                                                  | <b>COMMENTS</b>                             |
| Alopecia on right arm at level of elbow                                                                                                                                                                                | Mild inguinal bruising                                                                                                                                                 | Missing end of digit 5 on left foot.<br>Missing part of pinna on left ear                                             | Sex swelling prominent along back (normal). |
| Alopecia along arms bilaterally                                                                                                                                                                                        | Right side inguinal bruising due to previous venipuncture                                                                                                              | Missing part of right pinna                                                                                           | Mensing                                     |
| Mild alopecia along arms                                                                                                                                                                                               | Bruising to upper right quadrant - injection site                                                                                                                      | Extracted two premolars on the lower left side; gum recession at the site of extracted teeth                          |                                             |
| Alopecia to left dorsal arm and at area of elbow - appears to be barbered. Area of alopecia at right elbow smaller than left arm - appears to be plucked. Area of alopecia on lateral surface of right and left thighs | Bruising in both inguinal areas. There is bruising around lower left quadrant biopsy site. Very minor bruising to biopsy site in upper right quadrant.                 | Area of tooth extraction appears healthy with some signs of the gum recession. Gum is pink with no signs of infection |                                             |
| Alopecia to left dorsal arm from elbow down the antebrachium. Alopecia at right elbow stable since last time. Alopecia on lateral surface left/right is stable.                                                        | Small bruise to upper left quadrant at injection site                                                                                                                  | Tooth extraction area appears healthy                                                                                 |                                             |
| Alopecia stable                                                                                                                                                                                                        | Resolving bruise on upper right quadrant. Bruise completely resolved in upper left quadrant from previous exam                                                         | First premolar on bottom right gum line is discolored. The tooth is not loose but gum is friable.                     |                                             |
| Alopecia is the same as previous exams                                                                                                                                                                                 | Bruising to inguinal areas - very mild bruising to biopsy sites (right and left upper quadrants). Some bruising to catheter site on right arm.                         |                                                                                                                       |                                             |
|                                                                                                                                                                                                                        | Bruising to SQ fat biopsy site. Crusting to skin biopsy sites - upper right and left quadrants. No discharge noted.                                                    |                                                                                                                       |                                             |
|                                                                                                                                                                                                                        | Bruising around SQ fat biopsy site on ventral abdomen. Crusting of skin biopsies in upper right and upper left quadrants.                                              |                                                                                                                       |                                             |
|                                                                                                                                                                                                                        | Upper quadrant biopsy sites crusted over completely, almost healed. SQ fat biopsy site erythema on edges - healing nicely with no additional swelling and/or discharge |                                                                                                                       |                                             |

**Table S6. Summary of serum chemistry profile for the fixed-dose efficacy study: Control animals C1-C5**

| Animal | Day | T.Bili | GGT | ALT | AST | LDH | ALK | CK  | BUN   | Crea  | Glu   | TP   | Alb  | Glob | Ca    | P     | Na    | K     | Cl    | CO2   | AG    | Osm       | Iron  | TIBC  | % Sat |
|--------|-----|--------|-----|-----|-----|-----|-----|-----|-------|-------|-------|------|------|------|-------|-------|-------|-------|-------|-------|-------|-----------|-------|-------|-------|
| ID#    |     | mg/dl  | U/L | U/L | U/L | U/L | U/L | U/L | mg/dl | mg/dl | mg/dl | g/dl | g/dl | g/dl | mg/dl | mg/dl | mEq/l | mEq/l | mEq/l | mEq/l | mEq/l | mOsmol/kg | ug/dl | ug/dl | %     |
| C1     | 1   | 0.22   | 37  | 63  | 22  | 209 | 115 | 328 | 11    | 0.7   | 64    | 7.2  | 4.8  | 2.4  | 9.6   | 4.4   | 144   | 3.7   | 109   | 24    | 14.7  | 295.5     | 119   | 300   | 39.67 |
| C1     | 8   | 0.15   | 36  | 45  | 22  | 238 | 121 | 88  | 13    | 0.7   | 67    | 7.2  | 4.6  | 2.6  | 9.7   | 3.6   | 146   | 3.7   | 112   | 22    | 15.7  | 300.4     | 109   | 316   | 34.49 |
| C1     | 15  | 0.26   | 35  | 19  | 23  | 318 | 121 | 150 | 10    | 0.7   | 97    | 7.6  | 4.7  | 2.9  | 9.8   | 3.8   | 146   | 3.7   | 111   | 22    | 16.7  | 299.3     | 152   | 325   | 46.77 |
| C1     | 22  | 0.17   | 34  | 21  | 18  | 170 | 104 | 117 | 11    | 0.7   | 69    | 7.4  | 4.7  | 2.7  | 9.7   | 4.5   | 146   | 3.7   | 110   | 24    | 15.7  | 299.8     | 109   | 323   | 33.75 |
| C1     | 29  | 0.17   | 35  | 49  | 19  | 133 | 109 | 77  | 10    | 0.7   | 71    | 7.5  | 4.8  | 2.7  | 9.7   | 4.4   | 147   | 3.5   | 112   | 25    | 13.5  | 301.5     | 110   | 325   | 33.85 |
| C1     | 36  | 0.18   | 34  | 39  | 16  | 138 | 93  | 96  | 9     | 0.6   | 67    | 7.0  | 4.4  | 2.6  | 9.6   | 4.1   | 146   | 3.6   | 111   | 25    | 13.6  | 298.9     | 91    | 321   | 28.35 |
| C1     | 43  | 0.19   | 37  | 71  | 22  | 171 | 91  | 81  | 11    | 0.6   | 61    | 8.0  | 4.7  | 3.3  | 10.0  | 4.8   | 147   | 3.7   | 110   | 23    | 17.7  | 301.3     | 94    | 347   | 27.09 |
| C1     | 50  | 0.19   | 34  | 62  | 26  | 258 | 99  | 83  | 10    | 0.6   | 61    | 7.6  | 4.6  | 3.0  | 9.9   | 5.1   | 146   | 4.0   | 111   | 22    | 17.0  | 299.0     | 108   | 313   | 34.50 |
| C1     | 57  | 0.20   | 36  | 41  | 20  | 139 | 96  | 175 | 13    | 0.7   | 61    | 7.3  | 4.7  | 2.6  | 9.7   | 4.6   | 145   | 3.5   | 109   | 23    | 16.5  | 298.0     | 64    | 335   | 19.10 |
| C2     | 1   | 0.30   | 46  | 38  | 25  | 332 | 87  | 222 | 14    | 0.9   | 89    | 6.4  | 4.0  | 2.4  | 9.0   | 4.7   | 147   | 3.9   | 108   | 26    | 16.9  | 303.9     | 160   | 317   | 50.47 |
| C2     | 8   | 0.27   | 44  | 31  | 30  | 481 | 92  | 102 | 15    | 0.8   | 59    | 6.2  | 4.0  | 2.2  | 9.1   | 3.3   | 146   | 4.1   | 107   | 26    | 17.1  | 300.6     | 132   | 321   | 41.12 |
| C2     | 15  | 0.22   | 46  | 28  | 26  | 452 | 100 | 51  | 13    | 0.8   | 62    | 6.4  | 3.8  | 2.6  | 8.9   | 4.2   | 147   | 3.9   | 110   | 25    | 15.9  | 302.1     | 147   | 332   | 44.28 |
| C2     | 22  | 0.25   | 43  | 33  | 30  | 189 | 100 | 75  | 14    | 0.8   | 66    | 6.6  | 4.0  | 2.6  | 8.8   | 4.8   | 147   | 4.4   | 110   | 26    | 15.4  | 302.7     | 112   | 336   | 33.33 |
| C2     | 29  | 0.17   | 46  | 39  | 25  | 216 | 121 | 129 | 11    | 0.8   | 76    | 6.5  | 4.0  | 2.5  | 9.0   | 3.7   | 147   | 3.8   | 107   | 32    | 11.8  | 302.2     | 132   | 348   | 37.93 |
| C2     | 36  | 0.21   | 45  | 35  | 29  | 472 | 111 | 78  | 14    | 0.8   | 62    | 6.4  | 3.9  | 2.5  | 9.1   | 4.6   | 148   | 4.0   | 109   | 28    | 15.0  | 304.4     | 70    | 358   | 19.55 |
| C2     | 43  | 0.22   | 46  | 39  | 25  | 305 | 89  | 81  | 13    | 0.8   | 69    | 6.5  | 4.1  | 2.4  | 9.0   | 5.0   | 148   | 4.0   | 108   | 27    | 17.0  | 304.5     | 108   | 355   | 30.42 |
| C2     | 50  | 0.23   | 46  | 36  | 29  | 456 | 96  | 83  | 13    | 0.8   | 71    | 6.8  | 4.1  | 2.7  | 9.1   | 5.1   | 147   | 4.0   | 107   | 28    | 16.0  | 302.6     | 111   | 352   | 31.53 |
| C2     | 57  | 0.18   | 48  | 38  | 24  | 247 | 110 | 79  | 16    | 0.8   | 71    | 6.8  | 4.1  | 2.7  | 9.2   | 4.1   | 147   | 4.1   | 107   | 30    | 14.1  | 303.7     | 116   | 368   | 31.52 |
| C3     | 1   | 0.24   | 57  | 25  | 19  | 166 | 58  | 45  | 14    | 0.8   | 58    | 7.0  | 4.7  | 2.3  | 9.7   | 3.6   | 148   | 4.3   | 113   | 21    | 18.3  | 304.2     | 84    | 332   | 25.30 |
| C3     | 8   | 0.19   | 54  | 30  | 21  | 189 | 73  | 185 | 14    | 1.0   | 61    | 6.8  | 4.6  | 2.2  | 10.0  | 3.6   | 149   | 3.9   | 111   | 24    | 17.9  | 306.4     | 109   | 342   | 31.87 |
| C3     | 15  | 0.20   | 53  | 26  | 22  | 224 | 64  | 187 | 12    | 1.0   | 55    | 6.9  | 4.5  | 2.4  | 9.6   | 3.2   | 148   | 4.0   | 111   | 22    | 19.0  | 303.3     | 107   | 342   | 31.29 |
| C3     | 22  | 0.15   | 57  | 28  | 18  | 109 | 63  | 177 | 12    | 0.9   | 55    | 6.8  | 4.4  | 2.4  | 9.4   | 3.8   | 148   | 3.9   | 113   | 25    | 13.9  | 303.3     | 108   | 348   | 31.03 |
| C3     | 29  | 0.15   | 56  | 30  | 18  | 128 | 60  | 80  | 12    | 0.8   | 75    | 6.8  | 4.4  | 2.4  | 9.7   | 3.0   | 147   | 3.9   | 113   | 26    | 11.9  | 302.5     | 126   | 367   | 34.33 |
| C3     | 36  | 0.13   | 54  | 36  | 22  | 217 | 70  | 743 | 14    | 0.8   | 62    | 6.8  | 4.2  | 2.6  | 9.6   | 4.1   | 149   | 3.9   | 110   | 28    | 14.9  | 306.4     | 96    | 381   | 25.20 |
| C3     | 43  | 0.15   | 56  | 27  | 21  | 164 | 63  | 62  | 15    | 0.8   | 60    | 7.5  | 4.6  | 2.9  | 10.0  | 5.9   | 148   | 4.1   | 109   | 23    | 20.1  | 304.7     | 80    | 401   | 19.95 |
| C3     | 50  | 0.39   | 51  | 23  | 15  | 145 | 68  | 61  | 14    | 0.8   | 62    | 6.8  | 4.2  | 2.6  | 9.5   | 4.3   | 145   | 3.9   | 109   | 26    | 13.9  | 298.4     | 91    | 366   | 24.86 |
| C3     | 57  | 0.17   | 56  | 36  | 20  | 117 | 65  | 64  | 15    | 0.8   | 66    | 6.8  | 4.3  | 2.5  | 9.9   | 4.5   | 148   | 4.0   | 110   | 25    | 17.0  | 305.0     | 61    | 395   | 15.44 |
| C4     | 1   | 0.11   | 46  | 37  | 30  | 493 | 110 | 260 | 15    | 0.8   | 63    | 7.1  | 4.2  | 2.9  | 9.3   | 2.6   | 144   | 3.6   | 109   | 23    | 15.6  | 296.9     | 99    | 337   | 29.4  |
| C4     | 8   | 0.16   | 44  | 40  | 36  | 634 | 112 | 393 | 12    | 0.7   | 55    | 7.1  | 4.2  | 2.9  | 9.3   | 3.1   | 146   | 3.6   | 112   | 22    | 15.6  | 299.3     | 90    | 358   | 25.1  |
| C4     | 15  | 0.14   | 41  | 31  | 34  | 626 | 106 | 621 | 12    | 0.8   | 51    | 6.5  | 4.0  | 2.5  | 9.1   | 3.9   | 145   | 3.6   | 107   | 27    | 14.6  | 297.1     | 148   | 348   | 42.5  |
| C4     | 22  | 0.14   | 42  | 31  | 35  | 716 | 124 | 271 | 11    | 0.8   | 49    | 7.0  | 4.2  | 2.8  | 9.2   | 3.8   | 145   | 3.5   | 110   | 25    | 13.5  | 296.7     | 123   | 347   | 35.4  |
| C4     | 29  | 0.11   | 44  | 28  | 21  | 275 | 94  | 556 | 13    | 0.8   | 52    | 7.1  | 4.2  | 2.9  | 9.3   | 3.6   | 146   | 3.9   | 110   | 28    | 11.9  | 299.5     | 137   | 357   | 38.4  |
| C4     | 36  | 0.14   | 40  | 41  | 38  | 730 | 100 | 605 | 13    | 0.8   | 50    | 7.0  | 4.2  | 2.8  | 9.2   | 3.6   | 146   | 3.6   | 109   | 26    | 14.6  | 299.4     | 134   | 357   | 37.5  |
| C4     | 43  | 0.14   | 41  | 61  | 38  | 670 | 89  | 464 | 11    | 0.8   | 49    | 6.8  | 4.2  | 2.6  | 9.3   | 3.5   | 146   | 3.4   | 109   | 27    | 13.4  | 298.7     | 123   | 353   | 34.8  |
| C4     | 50  | 0.15   | 42  | 36  | 29  | 435 | 92  | 235 | 14    | 0.9   | 57    | 7.2  | 4.4  | 2.8  | 9.3   | 4.6   | 143   | 3.7   | 107   | 23    | 16.7  | 294.2     | 110   | 366   | 30.1  |
| C4     | 57  | 0.12   | 42  | 51  | 29  | 304 | 86  | 428 | 12    | 0.8   | 61    | 7.2  | 4.2  | 3.0  | 9.4   | 4.3   | 145   | 3.6   | 108   | 25    | 15.6  | 297.7     | 127   | 367   | 34.6  |
| C5     | 1   | 0.16   | 62  | 46  | 28  | 185 | 90  | 238 | 15    | 0.8   | 67    | 6.3  | 3.9  | 2.4  | 9.0   | 3.1   | 145   | 3.9   | 111   | 26    | 11.9  | 299.1     | 100   | 299   | 33.4  |
| C5     | 8   | 0.20   | 61  | 66  | 25  | 206 | 83  | 385 | 14    | 0.9   | 53    | 6.2  | 4.1  | 2.1  | 9.0   | 3.0   | 145   | 3.8   | 112   | 24    | 12.8  | 297.9     | 100   | 306   | 32.7  |
| C5     | 15  | 0.15   | 58  | 42  | 28  | 246 | 77  | 465 | 14    | 0.9   | 57    | 6.4  | 4.1  | 2.3  | 9.2   | 3.6   | 145   | 3.6   | 110   | 26    | 12.6  | 298.2     | 125   | 325   | 38.5  |
| C5     | 22  | 0.14   | 59  | 91  | 42  | 318 | 89  | 312 | 13    | 0.8   | 61    | 6.5  | 4.2  | 2.3  | 9.2   | 4.2   | 144   | 3.3   | 109   | 26    | 12.3  | 296.0     | 103   | 322   | 32.0  |
| C5     | 29  | 0.15   | 57  | 74  | 29  | 123 | 73  | 342 | 15    | 0.9   | 63    | 6.0  | 3.9  | 2.1  | 9.1   | 4.2   | 146   | 3.6   | 111   | 28    | 10.6  | 300.9     | 111   | 297   | 37.4  |
| C5     | 36  | 0.17   | 56  | 40  | 25  | 215 | 72  | 482 | 17    | 0.8   | 70    | 6.5  | 4.1  | 2.4  | 8.9   | 4.0   | 146   | 3.5   | 111   | 24    | 14.5  | 302.0     | 140   | 322   | 43.5  |
| C5     | 43  | 0.14   | 70  | 108 | 40  | 233 | 78  | 212 | 14    | 0.8   | 60    | 6.8  | 4.2  | 2.6  | 9.5   | 3.2   | 146   | 3.4   | 111   | 26    | 12.4  | 300.3     | 105   | 333   | 31.5  |
| C5     | 50  | 0.19   | 67  | 84  | 31  | 180 | 74  | 502 | 17    | 0.8   | 70    | 6.9  | 4.2  | 2.7  | 9.3   | 4.5   | 144   | 3.5   | 110   | 24    | 13.5  | 298.0     | 122   | 331   | 36.9  |
| C5     | 57  | 0.14   | 63  | 44  | 26  | 147 | 71  | 262 | 14    | 0.9   | 65    | 6.6  | 4.1  | 2.5  | 9.4   | 4.3   | 144   | 3.6   | 109   | 22    | 16.6  | 296.6     | 90    | 325   | 27.7  |



**Table S6 (cont.). Summary of serum chemistry profile for the fixed-dose efficacy study: Treated animals T1-T5**

| Animal | Day | T.Bili | GGT | ALT | AST | LDH | ALK | CK  | BUN   | Crea  | Glu   | TP   | Alb  | Glob | Ca    | P     | Na    | K     | Cl    | CO2   | AG    | Osm       | Iron  | TIBC  | % Sat |
|--------|-----|--------|-----|-----|-----|-----|-----|-----|-------|-------|-------|------|------|------|-------|-------|-------|-------|-------|-------|-------|-----------|-------|-------|-------|
| ID#    |     | mg/dl  | U/L | U/L | U/L | U/L | U/L | U/L | mg/dl | mg/dl | mg/dl | g/dl | g/dl | g/dl | mg/dl | mg/dl | mEq/l | mEq/l | mEq/l | mEq/l | mEq/l | mOsmol/kg | ug/dl | ug/dl | %     |
| T1     | 1   | 0.15   | 40  | 39  | 19  | 148 | 133 | 226 | 11    | 0.7   | 71    | 7.6  | 4.5  | 3.1  | 9.4   | 5.2   | 145   | 4.2   | 111   | 21    | 17.2  | 297.9     | 126   | 410   | 30.73 |
| T1     | 8   | 0.13   | 37  | 34  | 26  | 345 | 164 | 245 | 14    | 1.1   | 67    | 7.4  | 4.0  | 3.4  | 9.3   | 3.4   | 147   | 4.0   | 113   | 22    | 16.0  | 302.7     | 106   | 381   | 27.82 |
| T1     | 15  | 0.16   | 36  | 27  | 24  | 293 | 144 | 489 | 18    | 1.1   | 68    | 7.2  | 3.9  | 3.3  | 9.3   | 4.0   | 149   | 3.8   | 113   | 23    | 16.8  | 308.2     | 77    | 367   | 20.98 |
| T1     | 22  | 0.17   | 34  | 17  | 18  | 209 | 137 | 319 | 15    | 1.1   | 70    | 7.4  | 4.1  | 3.3  | 9.3   | 3.3   | 148   | 3.9   | 116   | 22    | 13.9  | 305.2     | 65    | 382   | 17.02 |
| T1     | 29  | 0.17   | 36  | 22  | 19  | 205 | 141 | 365 | 19    | 1.2   | 78    | 7.5  | 4.3  | 3.2  | 9.4   | 2.9   | 144   | 4.2   | 113   | 22    | 13.2  | 299.1     | 84    | 378   | 22.22 |
| T1     | 36  | 0.14   | 33  | 20  | 18  | 184 | 138 | 119 | 17    | 1.0   | 75    | 7.2  | 4.2  | 3.0  | 9.2   | 1.8   | 147   | 3.6   | 114   | 21    | 15.6  | 304.2     | 55    | 358   | 15.36 |
| T1     | 43  | 0.19   | 37  | 20  | 21  | 211 | 128 | 190 | 15    | 1.0   | 71    | 7.7  | 4.5  | 3.2  | 9.8   | 2.4   | 148   | 3.7   | 113   | 22    | 16.7  | 305.3     | 58    | 387   | 14.99 |
| T1     | 50  | 0.19   | 36  | 24  | 21  | 243 | 124 | 115 | 13    | 0.9   | 63    | 7.3  | 4.4  | 2.7  | 9.5   | 3.7   | 146   | 3.6   | 109   | 24    | 16.6  | 300.1     | 77    | 366   | 21.04 |
| T1     | 57  | 0.21   | 39  | 40  | 22  | 138 | 126 | 117 | 14    | 0.9   | 64    | 7.9  | 4.6  | 3.3  | 10.0  | 4.0   | 146   | 3.8   | 112   | 22    | 15.8  | 300.6     | 52    | 427   | 12.18 |
| T2     | 1   | 0.16   | 45  | 21  | 27  | 187 | 72  | 400 | 17    | 0.7   | 62    | 7.1  | 4.3  | 2.8  | 9.2   | 5.1   | 148   | 3.6   | 110   | 24    | 17.6  | 305.5     | 52    | 336   | 15.48 |
| T2     | 8   | 0.16   | 45  | 32  | 36  | 386 | 85  | 275 | 19    | 1.1   | 60    | 7.2  | 4.0  | 3.2  | 9.4   | 3.6   | 148   | 3.4   | 111   | 24    | 16.4  | 306.1     | 77    | 351   | 21.94 |
| T2     | 15  | 0.15   | 44  | 23  | 26  | 311 | 77  | 151 | 17    | 1.3   | 62    | 7.3  | 3.9  | 3.4  | 9.3   | 2.2   | 149   | 3.4   | 114   | 22    | 16.4  | 307.5     | 48    | 322   | 14.91 |
| T2     | 22  | 0.16   | 42  | 21  | 25  | 297 | 89  | 147 | 16    | 1.4   | 66    | 7.1  | 4.0  | 3.1  | 9.4   | 2.0   | 149   | 3.3   | 114   | 24    | 14.3  | 307.4     | 47    | 331   | 14.20 |
| T2     | 29  | 0.17   | 45  | 22  | 23  | 225 | 95  | 220 | 16    | 2.0   | 71    | 7.3  | 4.3  | 3.0  | 9.8   | 1.8   | 148   | 3.2   | 113   | 25    | 13.2  | 305.7     | 78    | 350   | 22.29 |
| T2     | 36  | 0.16   | 46  | 15  | 20  | 180 | 93  | 54  | 16    | 1.8   | 68    | 7.2  | 4.3  | 2.9  | 9.9   | 1.3   | 149   | 3.3   | 113   | 24    | 15.3  | 307.5     | 53    | 351   | 15.10 |
| T2     | 43  | 0.20   | 47  | 14  | 22  | 175 | 87  | 58  | 17    | 1.3   | 60    | 7.6  | 4.3  | 3.3  | 9.3   | <1.0  | 149   | 3.1   | 113   | 24    | 15.1  | 307.4     | 39    | 355   | 10.99 |
| T2     | 50  | 0.15   | 48  | 17  | 22  | 170 | 95  | 102 | 16    | 1.1   | 67    | 7.3  | 4.2  | 3.1  | 9.4   | 1.9   | 145   | 3.1   | 106   | 26    | 16.1  | 299.4     | 62    | 350   | 17.71 |
| T2     | 57  | 0.18   | 51  | 19  | 24  | 156 | 82  | 90  | 17    | 0.9   | 64    | 7.4  | 4.3  | 3.1  | 9.5   | 3.5   | 148   | 3.4   | 111   | 26    | 14.4  | 305.6     | 44    | 370   | 11.89 |
| T3     | 1   | 0.16   | 35  | 44  | 21  | 168 | 144 | 123 | 13    | 0.7   | 69    | 7.2  | 4.1  | 3.1  | 9.6   | 4.6   | 146   | 3.5   | 108   | 24    | 17.5  | 300.5     | 90    | 376   | 23.94 |
| T3     | 8   | 0.17   | 31  | 38  | 24  | 375 | 268 | 149 | 18    | 1.3   | 64    | 6.6  | 3.7  | 2.9  | 9.1   | 2.4   | 145   | 3.5   | 113   | 19    | 16.5  | 300.0     | 57    | 329   | 17.33 |
| T3     | 15  | 0.15   | 34  | 33  | 19  | 240 | 254 | 204 | 18    | 1.3   | 63    | 7.0  | 3.9  | 3.1  | 9.7   | 2.8   | 147   | 3.2   | 114   | 19    | 17.2  | 303.9     | 49    | 342   | 14.33 |
| T3     | 22  | 0.15   | 29  | 24  | 19  | 251 | 213 | 193 | 15    | 1.2   | 63    | 6.8  | 3.8  | 3.0  | 9.3   | 1.7   | 147   | 3.4   | 115   | 20    | 15.4  | 302.9     | 53    | 317   | 16.72 |
| T3     | 29  | 0.16   | 32  | 27  | 18  | 186 | 263 | 251 | 8     | 1.5   | 76    | 7.1  | 4.1  | 3.0  | 9.8   | 1.4   | 147   | 3.2   | 117   | 20    | 13.2  | 301.1     | 45    | 338   | 13.31 |
| T3     | 36  | 0.16   | 29  | 17  | 16  | 173 | 226 | 134 | 11    | 1.4   | 73    | 6.4  | 3.8  | 2.6  | 9.4   | 1.4   | 144   | 3.3   | 111   | 22    | 14.3  | 296.0     | 34    | 309   | 11.00 |
| T3     | 43  | 0.16   | 31  | 17  | 18  | 241 | 183 | 86  | 11    | 1.2   | 59    | 7.1  | 4.1  | 3.0  | 9.6   | 1.7   | 147   | 3.3   | 113   | 21    | 16.3  | 301.2     | 46    | 328   | 14.02 |
| T3     | 50  | 0.15   | 29  | 23  | 18  | 140 | 167 | 377 | 10    | 1.1   | 72    | 6.7  | 3.8  | 2.9  | 9.3   | 1.9   | 145   | 3.2   | 111   | 24    | 13.2  | 297.6     | 63    | 288   | 21.88 |
| T3     | 57  | 0.13   | 32  | 19  | 17  | 171 | 131 | 140 | 12    | 0.9   | 68    | 6.8  | 4.1  | 2.7  | 9.9   | 1.9   | 146   | 3.4   | 111   | 24    | 14.4  | 300.1     | 49    | 338   | 14.50 |
| T4     | 1   | 0.18   | 41  | 41  | 23  | 149 | 89  | 239 | 14    | 0.6   | 71    | 7.1  | 4.2  | 2.9  | 9.5   | 6.0   | 145   | 4.1   | 110   | 22    | 17.1  | 298.9     | 67    | 360   | 18.61 |
| T4     | 8   | 0.15   | 38  | 42  | 24  | 304 | 115 | 51  | 13    | 1.4   | 67    | 6.9  | 3.7  | 3.2  | 9.5   | 3.4   | 145   | 3.4   | 114   | 17    | 17.4  | 298.4     | 61    | 345   | 17.68 |
| T4     | 15  | 0.16   | 36  | 28  | 21  | 188 | 107 | 49  | 14    | 1.1   | 62    | 7.2  | 3.8  | 3.4  | 9.7   | 3.7   | 148   | 3.5   | 114   | 21    | 16.5  | 304.4     | 55    | 349   | 15.76 |
| T4     | 22  | 0.18   | 33  | 18  | 23  | 310 | 110 | 191 | 10    | 1.0   | 69    | 7.3  | 3.9  | 3.4  | 9.7   | 2.3   | 147   | 4.0   | 114   | 22    | 15.0  | 301.4     | 44    | 345   | 12.75 |
| T4     | 29  | 0.19   | 34  | 21  | 20  | 164 | 127 | 97  | 8     | 1.3   | 70    | 7.0  | 4.0  | 3.0  | 9.6   | 2.0   | 146   | 3.4   | 116   | 21    | 12.4  | 298.7     | 45    | 329   | 13.68 |
| T4     | 36  | 0.13   | 32  | 21  | 20  | 163 | 120 | 64  | 13    | 1.0   | 77    | 6.9  | 3.9  | 3.0  | 9.4   | 1.5   | 144   | 3.4   | 113   | 20    | 14.4  | 296.9     | 40    | 350   | 11.43 |
| T4     | 43  | 0.15   | 35  | 16  | 18  | 133 | 112 | 63  | 7     | 0.9   | 72    | 6.9  | 4.0  | 2.9  | 9.5   | 1.5   | 146   | 3.6   | 113   | 24    | 12.6  | 298.5     | 39    | 355   | 10.99 |
| T4     | 50  | 0.16   | 35  | 20  | 20  | 138 | 118 | 49  | 11    | 1.0   | 74    | 7.0  | 4.0  | 3.0  | 9.8   | 2.4   | 146   | 3.5   | 111   | 24    | 14.5  | 300.0     | 54    | 343   | 15.74 |
| T4     | 57  | 0.15   | 36  | 20  | 20  | 138 | 103 | 46  | 11    | 0.8   | 71    | 7.0  | 4.1  | 2.9  | 9.6   | 3.8   | 146   | 3.3   | 110   | 25    | 14.3  | 299.9     | 41    | 363   | 11.29 |
| T5     | 1   | 0.17   | 36  | 28  | 20  | 182 | 179 | 162 | 11    | 0.5   | 67    | 6.7  | 3.9  | 2.8  | 9.4   | 5.8   | 146   | 4.2   | 109   | 24    | 17.2  | 299.7     | 107   | 336   | 31.85 |
| T5     | 8   | 0.15   | 35  | 40  | 20  | 439 | 302 | 182 | 12    | 1.1   | 70    | 6.9  | 3.6  | 3.3  | 9.5   | 3.6   | 143   | 3.8   | 112   | 18    | 16.8  | 294.2     | 58    | 293   | 19.80 |
| T5     | 15  | 0.21   | 32  | 20  | 17  | 280 | 444 | 181 | 6     | 1.0   | 67    | 7.2  | 3.6  | 3.6  | 9.4   | 2.6   | 149   | 3.1   | 110   | 22    | 20.1  | 303.9     | 25    | 277   | 9.03  |
| T5     | 22  | 0.19   | 30  | 19  | 15  | 198 | 539 | 87  | 5     | 1.1   | 87    | 7.1  | 3.5  | 3.6  | 9.8   | 1.7   | 146   | 3.0   | 107   | 27    | 15.0  | 298.6     | 40    | 283   | 14.13 |
| T5     | 29  | 0.24   | 31  | 17  | 16  | 243 | 779 | 45  | 5     | 1.1   | 59    | 7.3  | 3.5  | 3.8  | 9.7   | 3.3   | 144   | 3.0   | 106   | 21    | 20.0  | 293.1     | 26    | 279   | 9.32  |
| T5     | 36  | 0.20   | 27  | 12  | 15  | 236 | 590 | 47  | 10    | 0.9   | 79    | 6.6  | 3.3  | 3.3  | 9.3   | 1.2   | 146   | 2.8   | 105   | 27    | 16.8  | 300.0     | 60    | 305   | 19.67 |
| T5     | 43  | 0.30   | 27  | 14  | 26  | 449 | 868 | 35  | 6     | 0.7   | 78    | 6.2  | 2.9  | 3.3  | 8.9   | 1.7   | 147   | 4.2   | 116   | 22    | 15.2  | 304.5     | 28    | 192   | 14.58 |
| T5     | 50  | 0.27   | 34  | 16  | 20  | 2   | 907 | 79  | 7     | 0.8   | 70    | 6.0  | 2.8  | 3.2  | 9.1   | 2.5   | 146   | 3.8   | 112   | 23    | 14.8  | 298.4     | 31    | 183   | 16.94 |
| T5     | 57  | 0.18   | 39  | 17  | 17  | 175 | 645 | 37  | 8     | 0.7   | 73    | 6.2  | 3.2  | 3.0  | 9.3   | 4.0   | 147   | 3.9   | 112   | 22    | 16.9  | 300.9     | 29    | 224   | 12.95 |

**Table S6 (cont.). Summary of serum chemistry profile for the fixed-dose efficacy study: Treated animals T6-T10**

| Animal | Day | T.Bili | GGT | ALT | AST | LDH  | ALK | CK   | BUN   | Crea  | Glu   | TP   | Alb  | Glob | Ca    | P     | Na    | K     | Cl    | CO2   | AG    | Osm       | Iron  | TIBC  | % Sat |
|--------|-----|--------|-----|-----|-----|------|-----|------|-------|-------|-------|------|------|------|-------|-------|-------|-------|-------|-------|-------|-----------|-------|-------|-------|
| ID#    |     | mg/dl  | U/L | U/L | U/L | U/L  | U/L | U/L  | mg/dl | mg/dl | mg/dl | g/dl | g/dl | g/dl | mg/dl | mg/dl | mEq/l | mEq/l | mEq/l | mEq/l | mEq/l | mOsmol/kg | ug/dl | ug/dl | %     |
| T6     | 1   | 0.18   | 61  | 56  | 27  | 245  | 61  | 303  | 18    | 1.1   | 74    | 6.8  | 3.8  | 3.0  | 9.1   | 6.2   | 149   | 3.9   | 106   | 27    | 19.9  | 308.5     | 167   | 320   | 52.19 |
| T6     | 8   | 0.20   | 71  | 54  | 23  | 398  | 97  | 117  | 21    | 2.2   | 78    | 7.3  | 3.9  | 3.4  | 9.4   | 3.7   | 148   | 3.2   | 112   | 21    | 18.2  | 307.8     | 96    | 324   | 29.63 |
| T6     | 15  | 0.20   | 76  | 32  | 28  | 514  | 91  | 627  | 11    | 2.2   | 75    | 7.4  | 3.9  | 3.5  | 10.2  | 3.4   | 152   | 3.5   | 113   | 26    | 16.5  | 312.1     | 96    | 313   | 30.67 |
| T6     | 22  | 0.16   | 66  | 23  | 16  | 250  | 97  | 245  | 10    | 1.9   | 77    | 7.3  | 3.9  | 3.4  | 9.6   | 2.1   | 151   | 3.4   | 114   | 26    | 14.4  | 309.8     | 119   | 296   | 40.20 |
| T6     | 29  | 0.17   | 68  | 20  | 16  | 188  | 139 | 175  | 8     | 2.2   | 83    | 7.1  | 3.7  | 3.4  | 9.3   | 1.9   | 151   | 3.3   | 115   | 26    | 13.3  | 309.5     | 63    | 283   | 22.26 |
| T6     | 36  | 0.15   | 69  | 25  | 24  | 410  | 164 | 138  | 8     | 2.0   | 70    | 7.4  | 3.8  | 3.6  | 9.4   | 1.7   | 148   | 3.4   | 110   | 26    | 15.4  | 302.7     | 82    | 295   | 27.80 |
| T6     | 43  | 0.18   | 74  | 17  | 25  | 405  | 154 | 71   | 11    | 1.6   | 75    | 7.8  | 3.8  | 4.0  | 9.3   | 1.7   | 147   | 3.6   | 110   | 24    | 16.6  | 302.1     | 78    | 290   | 26.90 |
| T6     | 50  | 0.17   | 68  | 22  | 19  | 180  | 122 | 153  | 9     | 1.3   | 78    | 7.2  | 3.6  | 3.6  | 9.0   | 4.8   | 148   | 3.4   | 107   | 28    | 16.4  | 303.5     | 99    | 269   | 36.80 |
| T6     | 57  | 0.13   | 70  | 17  | 21  | 228  | 85  | 60   | 13    | 1.1   | 80    | 7.3  | 3.8  | 3.5  | 9.3   | 4.5   | 146   | 3.4   | 105   | 26    | 18.4  | 301.1     | 83    | 301   | 27.57 |
| T7     | 1   | 0.17   | 47  | 35  | 31  | 521  | 124 | 846  | 16    | 0.8   | 70    | 6.7  | 3.8  | 2.9  | 8.9   | 2.7   | 145   | 3.7   | 107   | 27    | 14.7  | 299.6     | 97    | 357   | 27.2  |
| T7     | 8   | 0.27   | 44  | 40  | 42  | 960  | 140 | 353  | 23    | 1.5   | 51    | 6.4  | 3.8  | 2.6  | 8.9   | 3.6   | 146   | 3.4   | 112   | 21    | 16.4  | 303.0     | 108   | 328   | 32.9  |
| T7     | 15  | 0.23   | 41  | 29  | 36  | 810  | 121 | 521  | 23    | 1.4   | 60    | 6.3  | 3.9  | 2.4  | 9.0   | 2.2   | 147   | 3.5   | 109   | 25    | 16.5  | 305.5     | 137   | 348   | 39.4  |
| T7     | 22  | 0.17   | 60  | 23  | 34  | 856  | 118 | 109  | 10    | 2.2   | 74    | 7.6  | 3.9  | 3.7  | 9.4   | 2.5   | 148   | 3.2   | 110   | 25    | 16.2  | 303.7     | 34    | 353   | 9.6   |
| T7     | 29  | 0.29   | 43  | 25  | 25  | 402  | 140 | 375  | 16    | 2.1   | 49    | 6.7  | 3.8  | 2.9  | 9.4   | 3.2   | 144   | 3.1   | 111   | 21    | 15.1  | 296.4     | 39    | 313   | 12.5  |
| T7     | 36  | 0.31   | 44  | 23  | 31  | 635  | 143 | 306  | 17    | 1.5   | 55    | 6.5  | 3.8  | 2.7  | 9.1   | 1.8   | 147   | 3.5   | 112   | 23    | 15.5  | 303.1     | 141   | 334   | 42.2  |
| T7     | 43  | 0.25   | 45  | 18  | 25  | 360  | 118 | 330  | 14    | 1.2   | 64    | 6.3  | 3.8  | 2.5  | 9.1   | 1.2   | 146   | 3.4   | 111   | 26    | 12.4  | 300.6     | 108   | 332   | 32.5  |
| T7     | 50  | 0.31   | 49  | 19  | 21  | 278  | 119 | 167  | 14    | 1.0   | 68    | 6.7  | 3.9  | 2.8  | 9.2   | 3.9   | 146   | 3.6   | 108   | 24    | 17.6  | 300.8     | 120   | 350   | 34.3  |
| T7     | 57  | 0.24   | 48  | 22  | 26  | 385  | 117 | 295  | 12    | 0.9   | 70    | 6.7  | 4.0  | 2.7  | 9.3   | 4.5   | 146   | 3.7   | 108   | 24    | 17.7  | 300.2     | 117   | 375   | 31.2  |
| T8     | 1   | 0.13   | 33  | 33  | 27  | 326  | 61  | 575  | 15    | 0.7   | 78    | 6.2  | 3.5  | 2.7  | 8.5   | 4.4   | 143   | 3.3   | 108   | 26    | 12.3  | 295.7     | 80    | 300   | 26.7  |
| T8     | 8   | 0.20   | 34  | 55  | 41  | 680  | 92  | 684  | 22    | 1.5   | 58    | 6.4  | 3.6  | 2.8  | 9.1   | 3.4   | 147   | 3.4   | 116   | 19    | 15.4  | 305.1     | 85    | 306   | 27.8  |
| T8     | 15  | 0.18   | 31  | 28  | 34  | 651  | 98  | 739  | 17    | 1.4   | 59    | 6.5  | 3.7  | 2.8  | 9.1   | 3.6   | 147   | 3.5   | 112   | 23    | 15.5  | 303.3     | 127   | 321   | 39.6  |
| T8     | 22  | 0.27   | 33  | 23  | 33  | 641  | 186 | 528  | 14    | 1.6   | 63    | 6.9  | 3.7  | 3.2  | 9.2   | 3.2   | 145   | 3.1   | 112   | 22    | 14.1  | 298.5     | 100   | 320   | 31.3  |
| T8     | 29  | 0.23   | 33  | 21  | 26  | 258  | 129 | 448  | 14    | 1.7   | 64    | 6.8  | 3.9  | 2.9  | 9.2   | 2.8   | 147   | 3.2   | 115   | 21    | 14.2  | 302.6     | 102   | 318   | 32.1  |
| T8     | 36  | 0.17   | 33  | 19  | 28  | 459  | 152 | 162  | 16    | 1.7   | 70    | 6.7  | 3.8  | 2.9  | 9.3   | 2.7   | 145   | 3.3   | 111   | 22    | 15.3  | 299.6     | 75    | 294   | 25.5  |
| T8     | 43  | 0.16   | 33  | 14  | 27  | 395  | 113 | 161  | 12    | 1.3   | 70    | 6.6  | 3.8  | 2.8  | 9.1   | 1.8   | 144   | 3.1   | 111   | 24    | 12.1  | 296.2     | 60    | 291   | 20.6  |
| T8     | 50  | 0.25   | 34  | 16  | 24  | 345  | 83  | 198  | 15    | 1.2   | 69    | 6.6  | 3.9  | 2.7  | 9.2   | 3.2   | 145   | 3.1   | 110   | 22    | 16.1  | 299.2     | 102   | 296   | 34.5  |
| T8     | 57  | 0.18   | 35  | 25  | 28  | 346  | 78  | 172  | 14    | 1.0   | 64    | 6.9  | 3.9  | 3.0  | 9.4   | 4.2   | 145   | 3.2   | 109   | 21    | 18.2  | 298.6     | 158   | 339   | 46.6  |
| T9     | 1   | 0.19   | 35  | 23  | 29  | 339  | 81  | 168  | 16    | 0.6   | 63    | 6.8  | 3.9  | 2.9  | 9.0   | 3.4   | 144   | 3.9   | 108   | 26    | 13.9  | 297.2     | 100   | 380   | 26.3  |
| T9     | 8   | 0.23   | 35  | 30  | 30  | 502  | 132 | 416  | 21    | 1.3   | 61    | 6.8  | 3.8  | 3.0  | 9.0   | 3.6   | 143   | 3.6   | 113   | 18    | 15.6  | 296.9     | 74    | 355   | 20.8  |
| T9     | 15  | 0.20   | 34  | 23  | 35  | 684  | 116 | 233  | 15    | 1.1   | 66    | 7.1  | 4.1  | 3.0  | 9.4   | 3.8   | 145   | 3.8   | 109   | 25    | 14.8  | 299.0     | 72    | 370   | 19.5  |
| T9     | 22  | 0.22   | 34  | 19  | 38  | 733  | 117 | 413  | 18    | 1.4   | 59    | 7.2  | 4.1  | 3.1  | 9.6   | 2.1   | 143   | 3.4   | 109   | 23    | 14.4  | 295.7     | 104   | 356   | 29.2  |
| T9     | 29  | 0.25   | 33  | 20  | 28  | 346  | 114 | 102  | 13    | 1.5   | 82    | 7.3  | 4.4  | 2.9  | 9.7   | 2.0   | 143   | 3.3   | 108   | 22    | 16.3  | 295.2     | 94    | 355   | 26.5  |
| T9     | 36  | 0.19   | 31  | 14  | 35  | 604  | 114 | 228  | 13    | 1.4   | 65    | 7.0  | 4.2  | 2.8  | 9.6   | 2.4   | 144   | 3.2   | 109   | 22    | 16.2  | 296.3     | 83    | 346   | 24.0  |
| T9     | 43  | 0.21   | 31  | 13  | 25  | 286  | 95  | 93   | 12    | 1.0   | 73    | 6.7  | 4.2  | 2.5  | 9.2   | 1.2   | 144   | 3.4   | 109   | 25    | 13.4  | 296.3     | 94    | 322   | 29.2  |
| T9     | 50  | 0.18   | 33  | 15  | 26  | 305  | 98  | 155  | 15    | 1.0   | 77    | 7.1  | 4.3  | 2.8  | 9.3   | 1.3   | 144   | 3.4   | 111   | 23    | 13.4  | 297.6     | 118   | 347   | 34.0  |
| T9     | 57  | 0.17   | 34  | 15  | 27  | 378  | 85  | 289  | 15    | 0.8   | 64    | 7.0  | 4.2  | 2.8  | 9.7   | 2.7   | 145   | 3.4   | 108   | 25    | 15.4  | 298.9     | 96    | 354   | 27.1  |
| T10    | 1   | 0.11   | 53  | 30  | 25  | 417  | 69  | 473  | 21    | 1.1   | 81    | 7.3  | 3.7  | 3.6  | 9.1   | 3.3   | 146   | 3.8   | 104   | 32    | 13.8  | 304.0     | 41    | 370   | 11.1  |
| T10    | 8   | 0.18   | 54  | 41  | 48  | 1469 | 104 | 1057 | 30    | 3.5   | 60    | 7.5  | 3.7  | 3.8  | 10.2  | 3.4   | 147   | 3.6   | 113   | 20    | 17.6  | 308.0     | 182   | 333   | 54.7  |
| T10    | 15  | 0.15   | 57  | 27  | 34  | 776  | 94  | 1476 | 17    | 2.1   | 65    | 7.3  | 3.8  | 3.5  | 9.7   | 2.9   | 150   | 3.6   | 109   | 26    | 18.6  | 309.7     | 35    | 361   | 9.7   |
| T10    | 22  | 0.32   | 45  | 29  | 40  | 903  | 157 | 286  | 13    | 1.8   | 52    | 6.9  | 3.9  | 3.0  | 9.4   | 2.4   | 146   | 3.7   | 110   | 23    | 16.7  | 299.5     | 115   | 334   | 34.4  |
| T10    | 29  | 0.23   | 62  | 25  | 26  | 394  | 143 | 753  | 8     | 2.2   | 61    | 7.4  | 3.8  | 3.6  | 9.1   | 1.9   | 150   | 3.2   | 113   | 24    | 16.2  | 306.2     | 34    | 342   | 9.9   |
| T10    | 36  | 0.17   | 56  | 20  | 30  | 635  | 211 | 716  | 7     | 1.9   | 78    | 7.1  | 3.4  | 3.7  | 9.1   | 2.0   | 149   | 3.2   | 111   | 25    | 16.2  | 304.8     | 24    | 329   | 7.3   |
| T10    | 43  | 0.15   | 52  | 15  | 24  | 342  | 227 | 676  | 8     | 1.7   | 75    | 6.9  | 3.3  | 3.6  | 9.1   | 1.6   | 147   | 3.6   | 111   | 25    | 14.6  | 301.0     | 24    | 327   | 7.3   |
| T10    | 50  | 0.16   | 64  | 17  | 22  | 229  | 198 | 446  | 12    | 1.5   | 74    | 7.4  | 3.4  | 4.0  | 9.0   | 2.2   | 146   | 3.4   | 109   | 25    | 15.4  | 300.4     | 24    | 352   | 6.8   |
| T10    | 57  | 0.12   | 62  | 14  | 20  | 243  | 128 | 216  | 13    | 1.2   | 83    | 7.6  | 3.4  | 4.2  | 9.2   | 4.5   | 146   | 3.6   | 107   | 24    | 18.6  | 301.3     | 32    | 354   | 9.0   |

**Table S7. Summary of urine analysis for the fixed-dose efficacy study: Control animals C1-C5**

| Animal ID# | Day | Color     | Appear | Glu mg/dl | Ket mg/dl | Bili mg/dl | Sp Grav NA | Blood mg/dl | pH NA | Prot mg/dl | SSA mg/dl | Leuk cells/ul | Casts per hpf | Epi cells per hpf | WBC per hpf | RBC per hpf | Bacteria per hpf     | Crystals per hpf |
|------------|-----|-----------|--------|-----------|-----------|------------|------------|-------------|-------|------------|-----------|---------------|---------------|-------------------|-------------|-------------|----------------------|------------------|
| C1         | 1   | Straw     | Cloudy | Neg       | Neg       | Neg        | 1.014      | Neg         | 8.5   | Trace      | Neg       | Small         | None          | 0-1sq             | None        | None        | Neg                  | 3+ AmP           |
| C1         | 8   | Straw     | Clear  | Neg       | Neg       | Neg        | 1.007      | Neg         | 8.5   | Neg        | N/A       | Neg           | None          | 0-1sq             | None        | None        | Neg                  | Neg              |
| C1         | 15  | Yellow    | Clear  | Neg       | Neg       | Neg        | 1.006      | Neg         | 8.5   | Neg        | N/A       | Neg           | None          | 0-1sq             | None        | None        | Neg                  | Neg              |
| C1         | 22  | Straw     | Hazy   | Neg       | Neg       | Neg        | 1.005      | Large       | 8.5   | Neg        | N/A       | Mod           | None          | 0-1sq             | 0-1         | 0-1         | Tr mixed             | Neg              |
| C1         | 29  | Straw     | Hazy   | Neg       | Neg       | Neg        | 1.002      | Neg         | 8.5   | Neg        | N/A       | Neg           | None          | 0-1sq             | None        | None        | Tr mixed             | Neg              |
| C1         | 36  | Straw     | Hazy   | Neg       | Neg       | Neg        | 1.003      | Neg         | 8.5   | Neg        | N/A       | Neg           | Trace         | None              | 2-5sq       | 0-1         | None                 | 2+               |
| C1         | 43  | Yellow    | Hazy   | Neg       | Neg       | Neg        | 1.010      | Neg         | 8.5   | Trace      | Neg       | Neg           | None          | 2-5sq             | 0-1         | None        | 1+ cocci             | Neg              |
| C1         | 50  | Straw     | Hazy   | Neg       | Neg       | Neg        | 1.005      | Neg         | 8.5   | Neg        | N/A       | Neg           | None          | 2-5sq             | None        | None        | Tr mixed             | Neg              |
| C1         | 57  | Yellow    | Hazy   | Neg       | Neg       | Neg        | 1.010      | Neg         | 8.5   | Trace      | Neg       | Neg           | None          | 0-1sq             | 0-1         | None        | 2+                   | Neg              |
| C2         | 1   | Yellow    | Hazy   | Neg       | Neg       | Neg        | 1.017      | Neg         | 8.5   | Neg        | N/A       | Norm          | 2-5 hval      | None              | None        | None        | Neg                  | 1+ CaOx          |
| C2         | 8   | Yellow    | Hazy   | Neg       | Neg       | Neg        | 1.008      | Neg         | 8.5   | Neg        | N/A       | Norm          | None          | 0-1sq             | None        | None        | Neg                  | Neg              |
| C2         | 15  | Yellow    | Clear  | Neg       | Neg       | Neg        | 1.009      | Tr-NH       | 8.5   | Neg        | N/A       | Norm          | None          | None              | None        | None        | Neg                  | Neg              |
| C2         | 22  | Yellow    | Clear  | Neg       | Neg       | Neg        | 1.010      | Neg         | 8.5   | Trace      | Neg       | Norm          | None          | None              | None        | None        | Neg                  | Neg              |
| C2         | 29  | Yellow    | Hazy   | Neg       | Neg       | Neg        | 1.007      | Neg         | 8.5   | Trace      | Neg       | Norm          | None          | None              | None        | None        | Neg                  | 1+ CaCarb        |
| C2         | 36  | Yellow    | Cloudy | Neg       | Neg       | Neg        | 1.011      | Small       | 8.5   | Trace      | Neg       | Norm          | None          | 6-10sq            | None        | None        | None                 | 2+               |
| C2         | 43  | Yellow    | Clear  | Neg       | Neg       | Neg        | 1.004      | Neg         | 8.0   | Neg        | N/A       | Norm          | None          | None              | None        | None        | Neg                  | Neg              |
| C2         | 50  | Straw     | Clear  | Neg       | Neg       | Neg        | 1.003      | Neg         | 8.0   | Neg        | N/A       | Norm          | None          | None              | None        | 0-1         | Neg                  | Neg              |
| C2         | 57  | Yellow    | Hazy   | Neg       | Neg       | Neg        | 1.006      | Neg         | 8.5   | Neg        | N/A       | Norm          | None          | 2-5sq             | 0-1         | None        | 2+                   | Neg              |
| C3         | 1   | Straw     | Hazy   | Neg       | Neg       | Neg        | 1.008      | Neg         | 8.5   | Neg        | N/A       | Neg           | 0-1 hval      | 0-1sq             | 0-1         | 0-1         | Tr mixed             | Neg              |
| C3         | 8   | Pink      | Hazy   | Neg       | Neg       | Neg        | 1.011      | Large       | 8.5   | 30         | 1+        | Neg           | None          | 0-1sq             | 0-1         | 21-50       | Neg                  | Neg              |
| C3         | 15  | Straw     | Hazy   | Neg       | Neg       | Neg        | 1.010      | Tr-H        | 8.5   | Trace      | Trace     | Small         | None          | 6-10sq            | 2-5         | None        | Neg                  | 2+ CaOx          |
| C3         | 22  | Straw     | Hazy   | Neg       | Neg       | Neg        | 1.005      | Tr-H        | 8.5   | Neg        | N/A       | Mod           | None          | 2-5sq             | None        | None        | Tr mixed             | Neg              |
| C3         | 29  | Yellow    | Hazy   | Neg       | Neg       | Neg        | 1.004      | Tr-H        | 8.5   | Neg        | N/A       | Neg           | None          | 2-5sq             | 0-1         | 2-5         | Tr mixed             | 2+ AmP           |
| C3         | 36  | Amber     | Cloudy | Neg       | Neg       | Neg        | 1.013      | Large       | 8.5   | 30         | 1+        | Trace         | None          | 6-10sq            | 0-1         | TNTC        | 1+                   | 2+ CaOx          |
| C3         | 43  | Yellow    | Hazy   | Neg       | Neg       | Neg        | 1.009      | Neg         | 8.5   | Trace      | Neg       | Neg           | None          | 6-10sq            | None        | None        | Neg                  | 1+ AmP           |
| C3         | 50  | Straw     | Hazy   | Neg       | Neg       | Neg        | 1.003      | Neg         | 8.5   | Neg        | N/A       | Large         | None          | 2-5sq             | 2-5         | None        | Tr, some motile rods | Neg              |
| C3         | 57  | Yellow    | Hazy   | Neg       | Neg       | Neg        | 1.014      | Neg         | 8.5   | Trace      | Neg       | Neg           | None          | 6-10sq            | None        | None        | Trace                | 2+ CaOx          |
| C4         | 1   | Straw     | Hazy   | Neg       | Neg       | Neg        | 1.001      | Tr-NH       | 8.0   | Neg        | N/A       | Neg           | None          | 0-1sq             | 2-5         | 0-1         | 3+ mixed             | Neg              |
| C4         | 8   | Yellow    | Hazy   | Neg       | Neg       | Neg        | 1.010      | Neg         | 8.5   | Neg        | N/A       | Mod           | None          | 0-3sq             | 2-5         | None        | Trace                | Neg              |
| C4         | 15  | Pink      | Hazy   | Neg       | Neg       | Neg        | 1.004      | Large       | 8.5   | 30         | Neg       | Small         | None          | 0-1sq             | 0-1         | 2-5         | Neg                  | Neg              |
| C4         | 22  | Straw     | Clear  | Neg       | Neg       | Neg        | 1.005      | Neg         | 8.5   | Neg        | N/A       | Trace         | None          | 2-5sq             | 0-1         | 0-1         | Neg                  | 1+ CaOx          |
| C4         | 29  | Straw     | Hazy   | Neg       | Neg       | Neg        | 1.005      | Neg         | 7.0   | Neg        | N/A       | Mod           | None          | 0-1sq             | None        | None        | Tr mixed             | Neg              |
| C4         | 36  | Yellow    | Clear  | Neg       | Neg       | Neg        | 1.006      | Neg         | 8.5   | Trace      | N/A       | Neg           | None          | 0-1sq             | None        | None        | Neg                  | Neg              |
| C4         | 43  | Yellow    | Clear  | Neg       | Neg       | Neg        | 1.010      | Neg         | 8.5   | Trace      | N/A       | Neg           | None          | 2-5sq             | 0-1         | None        | Trace                | Neg              |
| C4         | 50  | Straw     | Hazy   | Neg       | Neg       | Neg        | 1.009      | Mod         | 8.5   | Neg        | N/A       | Trace         | None          | 0-1sq             | 0-1         | None        | Neg                  | 1+ CaOx          |
| C4         | 57  | Straw     | Hazy   | Neg       | Neg       | Neg        | 1.007      | Tr-H        | 8.5   | Neg        | N/A       | Neg           | None          | 0-2sq             | None        | 0-1         | 1+ mixed             | Neg              |
| C5         | 1   | Straw     | Hazy   | Neg       | Neg       | Neg        | 1.001      | Large       | 8.5   | Neg        | N/A       | Mod           | None          | 2-5sq             | 2-5         | 0-1         | Tr mixed             | Neg              |
| C5         | 8   | Colorless | Hazy   | Neg       | Neg       | Neg        | 1.002      | Neg         | 8.0   | Neg        | N/A       | Neg           | None          | 0-1sq             | 0-1         | 0-1         | Tr mixed             | Neg              |
| C5         | 15  | Colorless | Hazy   | Neg       | Neg       | Neg        | 1.003      | Neg         | 8.5   | Neg        | N/A       | Mod           | None          | 0-1sq             | None        | None        | Neg                  | Neg              |
| C5         | 22  | Straw     | Hazy   | Neg       | Neg       | Neg        | 1.004      | Neg         | 8.5   | Neg        | N/A       | Large         | None          | 2-5sq             | 2-5         | 0-1         | Tr mixed             | Neg              |
| C5         | 29  | Straw     | Hazy   | Neg       | Neg       | Neg        | 1.004      | Tr-H        | 8.0   | Neg        | N/A       | Mod           | None          | 6-10sq            | 2-5         | 0-1         | Tr mixed             | Neg              |
| C5         | 36  | Yellow    | Clear  | Neg       | Neg       | Neg        | 1.010      | Neg         | 8.5   | Neg        | N/A       | Neg           | None          | 2-5sq             | None        | None        | Neg                  | Neg              |
| C5         | 43  | Yellow    | Clear  | Neg       | Neg       | Neg        | 1.005      | Neg         | 8.0   | Neg        | N/A       | Trace         | None          | 2-5sq             | 0-1         | None        | 1+                   | Neg              |
| C5         | 50  | Yellow    | Clear  | Neg       | Neg       | Neg        | 1.016      | Mod         | 6.5   | Trace      | N/A       | Neg           | None          | 2-5sq             | 0-1         | 11-20       | Trace                | Neg              |
| C5         | 57  | Yellow    | Hazy   | Neg       | Neg       | Neg        | 1.017      | Neg         | 8.5   | Neg        | N/A       | Trace         | None          | 0-3sq             | 0-1         | None        | Neg                  | 1+ CaOx          |

**Table S7 (cont.). Summary of urinalysis for the fixed-dose efficacy study: Treated animals T1-T5**

| Anim ID# | Day | Color    | Appear | Glu mg/dl | Ket mg/dl | Bili mg/dl | Sp Grav NA | Blood mg/dl | pH NA | Prot mg/dl | SSA mg/dl | Leuk cells/ul | Casts per hpf   | Epi cells per hpf | WBC per hpf | RBC per hpf | Bacteria per hpf    | Crystals per hpf |
|----------|-----|----------|--------|-----------|-----------|------------|------------|-------------|-------|------------|-----------|---------------|-----------------|-------------------|-------------|-------------|---------------------|------------------|
| T1       | 1   | Yellow   | Cloudy | Neg       | Neg       | Neg        | 1.013      | Neg         | 8.5   | Neg        | N/A       | Neg           | None            | None              | None        | None        | Neg                 | 2+ AmP           |
| T1       | 8   | Straw    | Cloudy | Neg       | Neg       | Neg        | 1.011      | Tr-NH       | 8.5   | 300        | 2+        | Neg           | None            | 2-5sq             | 0-1         | 2-5         | Neg                 | 2+ AmP           |
| T1       | 15  | Straw    | Hazy   | 1000      | Neg       | Neg        | 1.010      | Neg         | 8.5   | 30         | Trace     | Neg           | None            | 2-5sq             | 0-1         | None        | Neg                 | Neg              |
| T1       | 22  | Straw    | Clear  | 1000      | Neg       | Neg        | 1.011      | Neg         | 8.5   | 30         | 2+        | Neg           | None            | 0-1sq,0-1tr       | None        | 0-1         | Tr mixed            | Neg              |
| T1       | 29  | Straw    | Clear  | 500       | Neg       | Neg        | 1.006      | Large       | 8.0   | Trace      | Trace     | Neg           | None            | 0-1sq             | 0-1         | 2-5         | Neg                 | Neg              |
| T1       | 36  | Lt amber | Hazy   | >2000     | Neg       | Neg        | 1.016      | Large       | 8.5   | 30         | Trace     | Neg           | None            | 11-20sq           | None        | TNTC        | 1+                  | Neg              |
| T1       | 43  | Yellow   | Hazy   | 250       | Neg       | Neg        | 1.010      | Neg         | 8.5   | Trace      | N/A       | Neg           | None            | 6-10sq,2-5tr      | 2-5         | None        | 1+ mixed            | Neg              |
| T1       | 50  | Straw    | Hazy   | Neg       | Neg       | Neg        | 1.005      | Tr-NH       | 8.0   | Neg        | N/A       | Neg           | None            | 2-5sq             | 11-20       | 2-5         | Tr mixed rods       | Neg              |
| T1       | 57  | Yellow   | Hazy   | Neg       | Neg       | Neg        | 1.007      | Neg         | 8.5   | Neg        | N/A       | Neg           | None            | 6-10sq            | None        | None        | Trace               | Neg              |
| T2       | 1   | Yellow   | Hazy   | Neg       | Neg       | Neg        | 1.015      | Large       | 8.5   | Trace      | Tr        | Mod           | None            | 2-5sq             | 2-5         | 2-5         | Neg                 | 1+ CaOx          |
| T2       | 8   | Yellow   | Hazy   | Neg       | Neg       | Neg        | 1.024      | Small       | 8.5   | >2000      | 3+        | Trace         | Hyaline0-1      | 2-5sq,0-1tr       | 2-5         | 0-1         | 1+ mixed            | 1+ AmP           |
| T2       | 15  | Yellow   | Hazy   | 250       | Neg       | Neg        | 1.018      | Large       | 8.5   | 30         | Trace     | Trace         | None            | 0-1sq             | 0-1         | 6-10        | Neg                 | Neg              |
| T2       | 22  | Yellow   | Clear  | 1000      | Neg       | Neg        | 1.015      | Tr-H        | 7.5   | 100        | Trace     | Neg           | None            | 0-1tr             | None        | 0-1         | Tr mixed            | Neg              |
| T2       | 29  | Yellow   | Hazy   | 500       | Neg       | Neg        | 1.014      | Tr-H        | 8.5   | 100        | 1+        | Neg           | None            | 0-1sq             | 0-1         | None        | Tr mixed            | Neg              |
| T2       | 36  | Yellow   | Hazy   | 500       | Neg       | Neg        | 1.008      | Neg         | 6.0   | Trace      | Trace     | Neg           | None            | 2-5sq             | None        | None        | Trace               | Neg              |
| T2       | 43  | Straw    | Hazy   | 250       | Neg       | Neg        | 1.010      | Neg         | 8.0   | Trace      | Neg       | Neg           | None            | 6-10sq,2-5tr      | 2-5         | None        | Tr mixed            | Neg              |
| T2       | 50  | Yellow   | Hazy   | Neg       | Neg       | Neg        | 1.011      | Neg         | 8.5   | Neg        | N/A       | Neg           | None            | 2-5sq             | 0-1         | None        | Neg                 | Neg              |
| T2       | 57  | Yellow   | Hazy   | Neg       | Neg       | Neg        | 1.014      | Neg         | 8.5   | Trace      | Neg       | Trace         | None            | 6-10sq            | 2-5         | None        | 1+                  | Neg              |
| T3       | 1   | Yellow   | Hazy   | Neg       | Neg       | Neg        | 1.011      | Neg         | 8.5   | Neg        | N/A       | Neg           | None            | 2-5sq             | 0-1         | 0-1         | Tr mixed            | 1+ AmP           |
| T3       | 8   | Yellow   | Hazy   | >2000     | 5         | Neg        | 1.036      | Large       | 7.5   | >2000      | 3+        | Trace         | None            | 2-5sq             | 6-10        | TNTC        | 1+ mixed            | Neg              |
| T3       | 15  | Straw    | Hazy   | >2000     | Neg       | Neg        | 1.032      | Small       | 6.0   | 100        | 1+        | Neg           | 0-1 cellular    | 2-5tr             | 6-10        | 0-1         | Neg                 | Neg              |
| T3       | 22  | Yellow   | Hazy   | 1000      | 15        | Neg        | 1.028      | Small       | 6.0   | 100        | 1+        | Neg           | None            | 0-1sq             | 0-1         | 0-1         | 2+ mixed            | Neg              |
| T3       | 29  | Yellow   | Hazy   | >2000     | Neg       | Neg        | 1.021      | Small       | 6.0   | 100        | 1+        | Neg           | 0-2 coarse oran | 6-10sq            | 0-1         | 0-1         | Neg                 | Neg              |
| T3       | 36  | Lt amber | Cloudy | >2000     | Neg       | Neg        | 1.024      | Neg         | 6.0   | 100        | 2+        | Trace         | None            | 6-10sq            | 11-20       | TNTC        | 1+                  | Neg              |
| T3       | 43  | Straw    | Hazy   | 500       | 5         | Neg        | 1.009      | Neg         | 6.0   | Trace      | Neg       | Trace         | 0-1hyaline      | 11-20sq           | 0-1         | None        | Tr mixed            | Neg              |
| T3       | 50  | Straw    | Hazy   | 250       | Neg       | Neg        | 1.007      | Neg         | 6.5   | Trace      | Trace     | Mod           | None            | 0-1tr, 2-5sq      | 2-5         | 0-1         | 1+mixed motile rods | Neg              |
| T3       | 57  | Yellow   | Hazy   | 100       | Neg       | Neg        | 1.009      | Neg         | 6.0   | Neg        | N/A       | Trace         | None            | 2-5sq             | 0-1         | None        | Trace               | Neg              |
| T4       | 1   | Yellow   | Hazy   | Neg       | Neg       | Neg        | 1.017      | Neg         | 8.5   | Neg        | N/A       | Neg           | 2-5 hyal        | None              | None        | None        | Neg                 | 1+ CaOx          |
| T4       | 8   | Yellow   | Hazy   | Neg       | Neg       | Neg        | 1.008      | Neg         | 8.5   | Neg        | N/A       | Neg           | None            | 0-1sq             | None        | None        | Neg                 | Neg              |
| T4       | 15  | Yellow   | Clear  | Neg       | Neg       | Neg        | 1.009      | Tr-NH       | 8.5   | Neg        | N/A       | Neg           | None            | None              | None        | None        | Neg                 | Neg              |
| T4       | 22  | Yellow   | Clear  | Neg       | Neg       | Neg        | 1.010      | Neg         | 8.5   | Trace      | Neg       | Neg           | None            | None              | None        | None        | Neg                 | Neg              |
| T4       | 29  | Yellow   | Hazy   | Neg       | Neg       | Neg        | 1.007      | Neg         | 8.5   | Trace      | Neg       | Neg           | None            | None              | None        | None        | Neg                 | 1+ CaCarb        |
| T4       | 36  | Yellow   | Cloudy | Neg       | Neg       | Neg        | 1.011      | Small       | 8.5   | Trace      | Neg       | Neg           | None            | 6-10sq            | None        | None        | None                | 2+               |
| T4       | 43  | Yellow   | Clear  | Neg       | Neg       | Neg        | 1.004      | Neg         | 8.0   | Neg        | N/A       | Neg           | None            | None              | None        | None        | Neg                 | Neg              |
| T4       | 50  | Straw    | Clear  | Neg       | Neg       | Neg        | 1.003      | Neg         | 8.0   | Neg        | N/A       | Neg           | None            | None              | None        | 0-1         | Neg                 | Neg              |
| T4       | 57  | Yellow   | Hazy   | Neg       | Neg       | Neg        | 1.006      | Neg         | 8.5   | Neg        | N/A       | Neg           | None            | 2-5sq             | 0-1         | None        | 2+                  | Neg              |
| T5       | 1   | Yellow   | Cloudy | Neg       | Neg       | Neg        | 1.012      | Neg         | 8.5   | Neg        | N/A       | Mod           | None            | 0-1sq             | 0-1         | 0-1         | Neg                 | 2+ AmP           |
| T5       | 8   | Straw    | Hazy   | >2000     | 15        | Neg        | 1.013      | Mod         | 7.5   | 300        | 2+        | Trace         | None            | 2-5sq             | 2-5         | 2-5         | Tr mixed            | Neg              |
| T5       | 15  | Pink     | Hazy   | >2000     | 40        | Neg        | 1.009      | Large       | 6.0   | 30         | 1+        | Neg           | None            | 2-5sq             | 2-5         | 11-20       | 1+ mixed            | Neg              |
| T5       | 22  | Straw    | Clear  | >2000     | Neg       | Neg        | 1.009      | Large       | 7.0   | 30         | Trace     | Small         | None            | 0-1sq,0-1tr       | 0-1         | 2-5         | Tr mixed            | Neg              |
| T5       | 29  | Yellow   | Hazy   | 250       | 40        | Neg        | 1.006      | Small       | 6.0   | 100        | 1+        | Small         | 0-1 coarse oran | 2-5sq             | 6-10        | 2-5         | 1+ mixed            | Neg              |
| T5       | 36  | Yellow   | Hazy   | 100       | 5         | Neg        | 1.004      | Small       | 7.0   | Neg        | N/A       | Neg           | None            | 6-10sq            | 6-10        | 2-5         | 1+                  | Neg              |
| T5       | 43  | Yellow   | Hazy   | 100       | Neg       | Neg        | 1.005      | Neg         | 8.0   | Neg        | N/A       | Neg           | None            | None              | Neg         | None        | Neg                 | Neg              |
| T5       | 50  | Yellow   | Hazy   | Neg       | 80        | Neg        | 1.006      | Neg         | 6.0   | Neg        | N/A       | Trace         | None            | 0-1tr, 0-1sq      | 2-5         | None        | Neg                 | Neg              |
| T5       | 57  | Yellow   | Clear  | Neg       | Neg       | Neg        | 1.004      | Neg         | 8.5   | Neg        | N/A       | Trace         | None            | 2-5sq             | 0-1         | None        | 1+                  | Neg              |

**Table S7 (cont.). Summary of urine analysis for the fixed-dose efficacy study: Treated animals T6-T10**

| Animal ID# | Day | Color     | Appear | Glu mg/dl | Ket mg/dl | Bili mg/dl | Sp Grav NA | Blood mg/dl | pH NA | Prot mg/dl | SSA mg/dl | Leuk cells/ul | Casts per hpf | Epi cells per hpf | WBC per hpf | RBC per hpf | Bacteria per hpf | Crystals per hpf |
|------------|-----|-----------|--------|-----------|-----------|------------|------------|-------------|-------|------------|-----------|---------------|---------------|-------------------|-------------|-------------|------------------|------------------|
| T6         | 1   | Yellow    | Hazy   | Neg       | Neg       | Neg        | 1.033      | Neg         | 8.5   | 30         | Tr        | Neg           | 0-1 hval      | 0-1sq             | 0-1         | None        | Neg              | Neg              |
| T6         | 8   | Straw     | Clear  | Neg       | Neg       | Neg        | 1.010      | Mod         | 6.0   | 100        | 1+        | Neg           | None          | 0-1sq,0-1tr       | None        | None        | Neg              | Neg              |
| T6         | 15  | Straw     | Hazy   | 1000      | Neg       | Neg        | 1.012      | Small       | 6.0   | 300        | 1+        | Neg           | None          | 2-5sq             | 0-1         | None        | Tr mixed         | Neg              |
| T6         | 22  | Straw     | Clear  | >2000     | Neg       | Neg        | 1.012      | Tr-NH       | 5.0   | 30         | 1+        | Neg           | None          | None              | 0-1         | None        | Tr mixed         | Neg              |
| T6         | 29  | Yellow    | Hazy   | 1000      | Neg       | Neg        | 1.016      | Small       | 6.5   | 100        | 1+        | Neg           | None          | 0-1sq             | 0-1         | 0-1         | Tr mixed         | Neg              |
| T6         | 36  | Straw     | Hazy   | 500       | Neg       | Neg        | 1.010      | Neg         | 6.5   | Trace      | Trace     | Neg           | None          | 0-1sq             | None        | None        | Trace            | Neg              |
| T6         | 43  | Yellow    | Hazy   | 100       | Neg       | Neg        | 1.010      | Neg         | 7.0   | Neg        | N/A       | Neg           | None          | 2-5sq             | None        | None        | Tr mixed         | Neg              |
| T6         | 50  | Yellow    | Clear  | Neg       | Neg       | Neg        | 1.011      | Neg         | 8.0   | Neg        | N/A       | Neg           | None          | None              | 0-1         | None        | Neg              | Neg              |
| T6         | 57  | Yellow    | Hazy   | Neg       | Neg       | Neg        | 1.023      | Neg         | 8.5   | Trace      | Trace     | Neg           | None          | 2-5sq             | None        | Trace       | Neg              | Neg              |
| T7         | 1   | Yellow    | Clear  | Neg       | Neg       | Neg        | 1.008      | Neg         | 8.5   | Neg        | N/A       | Neg           | None          | None              | None        | None        | Neg              | Neg              |
| T7         | 8   | Yellow    | Cloudy | 1000      | Neg       | Neg        | 1.014      | Small       | 8.5   | 300        | 2+        | Trace         | None          | 0-2sq             | 0-1         | None        | Neg              | Neg              |
| T7         | 15  | Yellow    | Hazy   | 500       | 15        | Neg        | 1.015      | Small       | 8.5   | 30         | 1+        | Neg           | None          | 0-3sq             | 0-1         | None        | Neg              | Neg              |
| T7         | 22  | Yellow    | Hazy   | 500       | Neg       | Neg        | 1.010      | Mod         | 7.5   | 100        | 2+        | Neg           | None          | 6-10sq            | 0-1         | 2-5         | 1+               | Neg              |
| T7         | 29  | Yellow    | Cloudy | 500       | 15        | Neg        | 1.011      | Small       | 6.0   | 100        | 1+        | Neg           | None          | 6-10sq            | 0-1         | 0-1         | 1+               | Neg              |
| T7         | 36  | Straw     | Clear  | 1000      | 5         | Neg        | 1.008      | Neg         | 8.5   | Trace      | Neg       | Neg           | None          | 0-1sq             | None        | None        | Neg              | Neg              |
| T7         | 43  | Yellow    | Clear  | 250       | Neg       | Neg        | 1.011      | Neg         | 8.5   | Trace      | Neg       | Neg           | None          | 0-1sq             | None        | None        | Trace            | Neg              |
| T7         | 50  | Yellow    | Hazy   | Neg       | Neg       | Neg        | 1.010      | Neg         | 8.5   | Trace      | Neg       | Neg           | None          | 0-1sq             | 0-1         | None        | Neg              | Neg              |
| T7         | 57  | Yellow    | Hazy   | Neg       | Neg       | Neg        | 1.009      | Neg         | 8.5   | Neg        | N/A       | Neg           | Nop           | 0-1sq             | None        | None        | Neg              | Tr CaOx          |
| T8         | 1   | Yellow    | Hazy   | Neg       | Neg       | Neg        | 1.013      | Neg         | 8.5   | Trace      | Neg       | Small         | None          | 2-5sq             | 2-5         | 0-1         | 1+ mixed         | Neg              |
| T8         | 8   | Yellow    | Cloudy | 500       | Neg       | Neg        | 1.012      | Small       | 8.5   | 300        | 2+        | Trace         | None          | 5-8sq             | 0-1         | None        | Neg              | Neg              |
| T8         | 15  | Yellow    | Hazy   | >2000     | Neg       | Neg        | 1.015      | Neg         | 8.5   | 30         | Neg       | Neg           | None          | 0-1sq             | 0-1         | 0-1         | Neg              | Neg              |
| T8         | 22  | Straw     | Hazy   | 1000      | Neg       | Neg        | 1.010      | Tr-NH       | 8.5   | 100        | 1+        | Trace         | None          | 2-5sq             | 0-1         | 0-1         | Tr mixed         | Neg              |
| T8         | 29  | Yellow    | Hazy   | 500       | Neg       | Neg        | 1.010      | Tr-H        | 8.0   | 30         | Trace     | Neg           | None          | 0-3sq             | None        | None        | Neg              | Neg              |
| T8         | 36  | Straw     | Clear  | >2000     | Neg       | Neg        | 1.012      | Neg         | 7.5   | 30         | Trace     | Neg           | None          | 2-4sq             | None        | None        | Neg              | Neg              |
| T8         | 43  | Yellow    | Clear  | 1000      | Neg       | Neg        | 1.017      | Neg         | 8.0   | Trace      | Neg       | Neg           | None          | 2-5sq             | 0-1         | None        | Trace            | Neg              |
| T8         | 50  | Yellow    | Hazy   | 250       | Neg       | Neg        | 1.020      | Neg         | 8.5   | 30         | Trace     | Trace         | None          | 0-1sq             | 11-20       | 0-1         | 1+ mixed         | Neg              |
| T8         | 57  | Yellow    | Hazy   | 100       | Neg       | Neg        | 1.019      | Neg         | 8.5   | Trace      | Neg       | Neg           | None          | 0-2sq             | None        | None        | Neg              | 1+ CaOx          |
| T9         | 1   | Colorless | Clear  | Neg       | Neg       | Neg        | 1.002      | Neg         | 8.5   | Neg        | N/A       | Small         | None          | 0-1sq             | 0-1         | 0-1         | 1+ mixed         | Neg              |
| T9         | 8   | Straw     | Cloudy | 1000      | Neg       | Neg        | 1.011      | Small       | 8.5   | 300        | 2+        | Neg           | None          | 6-8sq             | None        | None        | 1+               | Neg              |
| T9         | 15  | Colorless | Hazy   | 500       | Neg       | Neg        | 1.005      | Neg         | 8.5   | Trace      | Neg       | Small         | None          | 0-1sq             | 0-1         | None        | Tr mixed         | Neg              |
| T9         | 22  | Yellow    | Hazy   | 1000      | Neg       | Neg        | 1.015      | Tr-H        | 8.5   | 100        | 1+        | Neg           | None          | 2-5sq             | 0-1         | None        | Tr mixed         | Neg              |
| T9         | 29  | Yellow    | Hazy   | 1000      | 5         | Neg        | 1.011      | Tr-H        | 8.5   | 30         | Trace     | Neg           | None          | 0-1sq             | None        | None        | Neg              | Neg              |
| T9         | 36  | Yellow    | Clear  | >2000     | 15        | Neg        | 1.010      | Small       | 6.0   | 30         | Trace     | Neg           | None          | 0-3sq             | None        | None        | Neg              | Neg              |
| T9         | 43  | Yellow    | Hazy   | 500       | Neg       | Neg        | 1.012      | Neg         | 8.5   | Trace      | Neg       | Neg           | None          | 6-10sq            | 0-1         | None        | 1+               | Neg              |
| T9         | 50  | Straw     | Hazy   | Neg       | Neg       | Neg        | 1.005      | Tr-H        | 8.5   | Neg        | N/A       | Trace         | None          | 0-1sq             | 0-1         | 0-1         | Tr mixed         | Neg              |
| T9         | 57  | Yellow    | Hazy   | Neg       | Neg       | Neg        | 1.015      | Neg         | 8.5   | Neg        | N/A       | Neg           | None          | 0-1sq             | None        | None        | Neg              | Tr CaOx          |
| T10        | 1   | Yellow    | Hazy   | Neg       | Neg       | Neg        | 1.006      | Neg         | 8.5   | Neg        | N/A       | Neg           | None          | None              | None        | None        | Neg              | Tr AmP           |
| T10        | 8   | Straw     | Hazy   | >2000     | Neg       | Neg        | 1.009      | Mod         | 6.0   | 300        | 1+        | Neg           | None          | 0-1tr             | 0-1         | 0-1         | Neg              | Neg              |
| T10        | 15  | Yellow    | Hazy   | 1000      | Neg       | Neg        | 1.014      | Large       | 6.0   | 100        | 2+        | Neg           | 0-1 fine gr   | 2-4sq             | 0-1         | None        | Neg              | Neg              |
| T10        | 22  | Straw     | Hazy   | >2000     | 5         | Neg        | 1.010      | Small       | 6.0   | 100        | 1+        | Neg           | None          | 0-1sq,0-1tr       | 0-1         | None        | Neg              | Neg              |
| T10        | 29  | Yellow    | Hazy   | 500       | 5         | Neg        | 1.007      | Small       | 6.0   | 30         | Trace     | Neg           | None          | 0-1sq             | None        | None        | Neg              | Neg              |
| T10        | 36  | Straw     | Clear  | >2000     | 5         | Neg        | 1.015      | Tr-H        | 6.0   | 100        | 1+        | Neg           | None          | 0-1sq             | None        | None        | Neg              | Neg              |
| T10        | 43  | Yellow    | Clear  | 100       | Neg       | Neg        | 1.009      | Neg         | 6.0   | Trace      | Neg       | Neg           | None          | 0-1sq             | None        | None        | Trace            | Neg              |
| T10        | 50  | Yellow    | Hazy   | Neg       | Neg       | Neg        | 1.014      | Neg         | 8.5   | Trace      | Neg       | Neg           | None          | 0-1sq             | None        | None        | Neg              | Neg              |
| T10        | 57  | Yellow    | Clear  | Neg       | Neg       | Neg        | 1.017      | Neg         | 8.5   | Trace      | Neg       | Neg           | None          | 0-1sq             | None        | None        | Neg              | Neg              |

## Supplementary References

- S1. N. L. Bodkin, J. S. Hannah, K. Ortmeier, B. C. Hansen, Central obesity in rhesus monkeys: association with hyperinsulinemia, insulin resistance and hypertriglyceridemia? *Int. J. Obes. Relat. Metab. Disord.* **17**, 53-61 (1993).
- S2. A. Raman, R. J. Colman, Y. Cheng, J. W. Kemnitz, S. T. Baum, R. Weindruch, D. A. Schoeller, Reference body composition in adult rhesus monkeys: glucoregulatory and anthropometric indices. *J. Gerontol. A Biol. Sci. Med. Sci.* **60**, 1518-1524 (2005).
- S3. M. M. Swarbrick, P. J. Havel, A. A. Levin, A. A. Bremer, K. L. Stanhope, M. Butler, S. L. Booten, J. L. Graham, R. A. McKay, S. F. Murray, L. M. Watts, B. P. Monia, S. Bhanot, Inhibition of protein tyrosine phosphatase-1B with antisense oligonucleotides improves insulin sensitivity and increases adiponectin concentration in monkeys. *Endocrinology* **150**, 1670-1679 (2009).
- S4. P. J. Diggle, K. Y. Liang, S. L. Zeger, *Analysis of Longitudinal Data* (Oxford Univ. Press, New York, ed. 2, 2002).
